# Supplementary material for: Regiospecific synthesis of polysubstituted furans with mono- to tricarboxylates from various sulfonium acylmethylides and acetylenic esters
Source: Royal Society of Chemistry journal article supplement (doi:10.1039/c9ra03563j), 2019-01-01

# Regiospecific synthesis of polysubstituted furans with mono- to tricarboxylates from various sulfonium acylmethylenes and acetylenic esters

Jun Dong, Hongguang Du, and Jiayi Xu\*

State Key Laboratory of Chemical Resource Engineering, Department of Organic Chemistry, College of Chemistry, Beijing University of Chemical Technology, Beijing 100029, People's Republic of China.

## Supporting Information

### Contents

|                                                                                           |     |
|-------------------------------------------------------------------------------------------|-----|
| Analytic data of furan products <b>3</b> .....                                            | S2  |
| Copies of <sup>1</sup> H and <sup>13</sup> C NMR spectra of furan products <b>3</b> ..... | S5  |
| Copies of HR-MS spectra of unknown furan products <b>3</b> .....                          | S33 |

### Analytic data of furan products 3

**Dimethyl 2-phenylfuran-3,4-dicarboxylate (3aa).**<sup>1</sup> Colorless liquid, 25 mg, yield 79%,  $R_f = 0.31$  (PE/EtOAc = 5/1, v/v). <sup>1</sup>H NMR (400 MHz, CDCl<sub>3</sub>):  $\delta$  7.97 (s, 1H, ArH), 7.70 (d,  $J = 7.8$  Hz, 2H, ArH), 7.44–7.38 (m, 3H, ArH), 3.91 (s, 3H), 3.85 (s, 3H). <sup>13</sup>C NMR (101 MHz, CDCl<sub>3</sub>):  $\delta$  164.8, 162.2, 154.1, 146.2, 129.4, 128.7, 128.4, 126.4, 119.7, 113.5, 52.7, 51.9.

**Dimethyl 2-(4-methylphenyl)furan-3,4-dicarboxylate (3ab).**<sup>1</sup> White solid, m.p. 99–101 °C, 30 mg, yield 89%,  $R_f = 0.56$  (PE/EtOAc = 5/1, v/v). <sup>1</sup>H NMR (400 MHz, CDCl<sub>3</sub>):  $\delta$  7.94 (s, 1H, ArH), 7.60 (d,  $J = 8.2$  Hz, 2H, ArH), 7.22 (d,  $J = 8.3$  Hz, 2H, ArH), 3.90 (s, 3H), 3.85 (s, 3H), 2.38 (s, 3H). <sup>13</sup>C NMR (101 MHz, CDCl<sub>3</sub>):  $\delta$  164.8, 162.3, 154.5, 145.9, 139.6, 129.3, 126.4, 125.9, 119.7, 112.8, 52.6, 51.9, 21.3.

**Dimethyl 2-(4-methoxyphenyl)furan-3,4-dicarboxylate (3ac).**<sup>1</sup> White solid, m.p. 54–55 °C, 21 mg, yield 59%,  $R_f = 0.39$  (PE/EtOAc = 5/1, v/v). <sup>1</sup>H NMR (400 MHz, CDCl<sub>3</sub>):  $\delta$  7.91 (s, 1H, ArH), 7.67 (d,  $J = 8.9$  Hz, 2H, ArH), 6.94 (d,  $J = 8.9$  Hz, 2H, ArH), 3.89 (s, 3H), 3.85 (s, 3H), 3.84 (s, 3H). <sup>13</sup>C NMR (101 MHz, CDCl<sub>3</sub>):  $\delta$  164.9, 162.3, 160.5, 154.7, 145.7, 128.2, 121.4, 119.7, 114.1, 112.0, 55.3, 52.5, 51.9.

**Dimethyl 2-(4-fluorophenyl)furan-3,4-dicarboxylate (3ad).** White solid, m.p. 95–97 °C, 30 mg, yield 87%,  $R_f = 0.56$  (PE/EtOAc = 5/1, v/v). IR (KBr):  $\nu = 3154, 2955, 1730, 1601, 1506, 842$  cm<sup>-1</sup>. <sup>1</sup>H NMR (400 MHz, CDCl<sub>3</sub>):  $\delta$  7.95 (s, 1H, ArH), 7.76–7.69 (m, 2H, ArH), 7.15–7.08 (m, 2H, ArH), 3.90 (s, 3H), 3.86 (s, 3H). <sup>13</sup>C NMR (101 MHz, CDCl<sub>3</sub>):  $\delta$  164.6, 163.3 (d,  $J_{F-C} = 250.5$  Hz), 162.0, 153.6, 146.1, 128.7 (d,  $J_{F-C} = 8.6$  Hz), 125.0 (d,  $J_{F-C} = 3.0$  Hz), 119.9, 115.8 (d,  $J_{F-C} = 22.0$  Hz), 113.3, 52.7, 52.0. <sup>19</sup>F NMR (377 MHz, CDCl<sub>3</sub>):  $\delta$  -110.5. HR-MS (ESI)  $m/z$  [M+H]<sup>+</sup> calcd for C<sub>14</sub>H<sub>12</sub>FO<sub>5</sub><sup>+</sup>: 279.0663, found: 279.0667.

**Dimethyl 2-(4-chlorophenyl)furan-3,4-dicarboxylate (3ae).**<sup>2</sup> White solid, m.p. 96–97 °C, 26 mg, yield 73%,  $R_f = 0.56$  (PE/EtOAc = 5/1, v/v). <sup>1</sup>H NMR (400 MHz, CDCl<sub>3</sub>):  $\delta$  7.96 (s, 1H, ArH), 7.66 (d,  $J = 8.7$  Hz, 2H, ArH), 7.39 (d,  $J = 8.9$  Hz, 2H, ArH), 3.91 (s, 3H), 3.86 (s, 3H). <sup>13</sup>C NMR (101 MHz, CDCl<sub>3</sub>):  $\delta$  164.6, 162.1, 153.2, 146.3, 135.5, 129.0, 127.8, 127.1, 119.9, 113.9, 52.8, 52.0.

**Dimethyl 2-(4-bromophenyl)furan-3,4-dicarboxylate (3af).**<sup>1</sup> White solid, m.p. 80–82 °C, 33 mg, yield 79%,  $R_f = 0.69$  (PE/EtOAc = 5/1, v/v). <sup>1</sup>H NMR (400 MHz, CDCl<sub>3</sub>):  $\delta$  7.96 (s, 1H, ArH), 7.59 (d,  $J = 9.0$  Hz, 2H, ArH), 7.55 (d,  $J = 8.9$  Hz, 2H, ArH), 3.91 (s, 3H), 3.85 (s, 3H). <sup>13</sup>C NMR (101 MHz, CDCl<sub>3</sub>):  $\delta$  164.5, 162.0, 153.1, 146.4, 131.9, 127.9, 127.6, 123.8, 119.9, 114.0, 52.8, 52.0.

**Dimethyl 2-(4-trifluoromethylphenyl)furan-3,4-dicarboxylate (3ag).** White solid, m.p. 82–84 °C, 35 mg, yield 86%,  $R_f = 0.41$  (PE/EtOAc = 5/1, v/v). IR (KBr):  $\nu = 3147, 2960, 1731, 1621, 1509, 841$  cm<sup>-1</sup>. <sup>1</sup>H NMR (400 MHz, CDCl<sub>3</sub>):  $\delta$  8.00 (s, 1H, ArH), 7.84 (d,  $J = 8.2$  Hz, 2H, ArH), 7.68 (d,  $J = 8.3$  Hz, 2H, ArH), 3.93 (s, 3H), 3.87 (s, 3H). <sup>13</sup>C NMR (101 MHz, CDCl<sub>3</sub>):  $\delta$  164.4, 161.9, 152.3, 146.8, 131.9, 131.05 (q,  $J_{F-C} = 32.6$  Hz), 126.6, 125.69 (q,  $J_{F-C} = 3.8$  Hz), 123.77 (q,  $J_{F-C} = 272.3$  Hz), 120.1, 115.2, 52.9, 52.1. <sup>19</sup>F NMR (377 MHz, CDCl<sub>3</sub>):  $\delta$  -62.9. HR-MS (ESI)  $m/z$  [M+H]<sup>+</sup> calcd for C<sub>15</sub>H<sub>12</sub>F<sub>3</sub>O<sub>5</sub><sup>+</sup>: 329.0631, found: 329.0634.

**Dimethyl 2-(4-cyanophenyl)furan-3,4-dicarboxylate (3ah).** White yellow solid, m.p. 154–155 °C, 30 mg, yield 85%,  $R_f = 0.31$  (PE/EtOAc = 5/1, v/v). IR (KBr):  $\nu = 3160, 2961, 2230, 1748, 1609, 1503, 855$  cm<sup>-1</sup>. <sup>1</sup>H NMR (400 MHz, CDCl<sub>3</sub>):  $\delta$  8.02 (s, 1H, ArH), 7.83 (d,  $J = 8.5$  Hz, 2H, ArH), 7.70 (d,  $J = 8.5$  Hz, 2H, ArH), 3.93 (s, 3H), 3.86 (s, 3H). <sup>13</sup>C NMR (101 MHz, CDCl<sub>3</sub>):  $\delta$  164.3, 161.7, 151.5, 147.1, 132.6, 132.5, 126.6, 120.3, 118.3, 115.9, 112.7, 53.0, 52.1. HR-MS (ESI)  $m/z$  [M+H]<sup>+</sup> calcd for C<sub>15</sub>H<sub>12</sub>NO<sub>5</sub><sup>+</sup>: 286.0710, found: 286.0707.

**Dimethyl 2-(4-nitrophenyl)furan-3,4-dicarboxylate (3ai).** Yellow white solid, m.p. 149–150 °C, 17 mg, yield 45%,  $R_f = 0.46$  (PE/EtOAc = 5/1, v/v). IR (KBr):  $\nu = 3143, 2958, 1729, 1518, 1491, 1339, 853$  cm<sup>-1</sup>. <sup>1</sup>H NMR (400 MHz, CDCl<sub>3</sub>):  $\delta$  8.28 (d,  $J = 8.9$  Hz, 2H, ArH), 8.05 (s, 1H, ArH), 7.90 (d,  $J = 8.9$  Hz, 2H, ArH), 3.95 (s, 3H), 3.87 (s, 3H). <sup>13</sup>C NMR (101 MHz, CDCl<sub>3</sub>):  $\delta$  164.2, 161.7, 151.2, 147.8, 147.4, 134.3, 126.9, 124.0, 120.4, 116.4, 53.0, 52.2. HR-MS (ESI)  $m/z$  [M+H]<sup>+</sup> calcd for C<sub>14</sub>H<sub>12</sub>NO<sub>7</sub><sup>+</sup>: 306.0608, found: 306.0616.

**Dimethyl 2-(3,4-dichlorophenyl)furan-3,4-dicarboxylate (3aj).** White solid, m.p. 90–92 °C, 30 mg, yield 74%,  $R_f = 0.57$  (PE/EtOAc = 5/1, v/v). IR (KBr):  $\nu = 3153, 2953, 1731, 1560, 1384, 885, 814$  cm<sup>-1</sup>. <sup>1</sup>H NMR (400 MHz, CDCl<sub>3</sub>):  $\delta$  7.97 (s, 1H, ArH), 7.84 (d,  $J = 2.1$  Hz, 1H, ArH), 7.58 (dd,  $J = 8.5, 2.1$  Hz, 1H, ArH), 7.49 (d,  $J = 8.5$  Hz, 1H, ArH), 3.92 (s, 3H), 3.86 (s, 3H). <sup>13</sup>C NMR (101 MHz, CDCl<sub>3</sub>):  $\delta$  164.2, 161.9, 151.8, 146.6, 133.7, 133.1, 130.7, 128.5, 128.3, 125.6, 120.1, 114.7, 52.9, 52.1. HR-MS (ESI)  $m/z$  [M+H]<sup>+</sup> calcd for C<sub>14</sub>H<sub>11</sub>Cl<sub>2</sub>O<sub>5</sub><sup>+</sup>: 328.9978, found: 328.9978.

**Dimethyl 2-(naphthalen-1-yl)furan-3,4-dicarboxylate (3ak).** Light green liquid, 33 mg, yield 85%,  $R_f = 0.57$  (PE/EtOAc = 5/1, v/v). IR (KBr):  $\nu = 3148, 2952, 1731, 1551$  cm<sup>-1</sup>. <sup>1</sup>H NMR (400 MHz, CDCl<sub>3</sub>):  $\delta$  8.11 (s, 1H, ArH), 7.96 (d,  $J = 8.3$  Hz, 1H, ArH), 7.92–7.88 (m, 1H, ArH), 7.84–7.79 (m, 1H, ArH), 7.67 (d,  $J = 7.1$  Hz, 1H, ArH), 7.56–7.48 (m, 3H, ArH), 3.91 (s, 3H), 3.66 (s, 3H). <sup>13</sup>C NMR (101 MHz, CDCl<sub>3</sub>):  $\delta$  163.5, 162.3, 156.0, 147.0, 133.5, 131.5, 130.6, 129.0, 128.4, 126.9, 126.2, 126.1, 125.1, 124.8, 119.3, 116.3, 52.2, 52.0. HR-MS (ESI)  $m/z$  [M+H]<sup>+</sup> calcd for C<sub>18</sub>H<sub>15</sub>O<sub>5</sub><sup>+</sup>: 311.0914, found: 311.0914.

**Dimethyl 2-(naphthalen-2-yl)furan-3,4-dicarboxylate (3al).** Green white solid, m.p. 105–107 °C, 29 mg, yield 75%,  $R_f = 0.39$  (PE/EtOAc = 10/1, v/v). IR (KBr):  $\nu = 3150, 2952, 1731, 1551$  cm<sup>-1</sup>. <sup>1</sup>H NMR (400 MHz,

CDCl<sub>3</sub>):  $\delta$  8.24–8.22 (m, 1H, ArH), 8.02 (s, 1H, ArH), 7.92–7.82 (m, 3H, ArH), 7.77 (dd,  $J$  = 8.7, 1.8 Hz, 1H, ArH), 7.56–7.48 (m, 2H, ArH), 3.95 (s, 3H), 3.88 (s, 3H). <sup>13</sup>C NMR (101 MHz, CDCl<sub>3</sub>):  $\delta$  164.9, 162.2, 154.2, 146.4, 133.4, 133.0, 128.6, 128.4, 127.7, 127.1, 126.7, 126.2, 126.0, 123.4, 119.9, 113.8, 52.7, 52.0. HR-MS (ESI)  $m/z$  [M+H]<sup>+</sup> calcd for C<sub>18</sub>H<sub>15</sub>O<sub>5</sub><sup>+</sup>: 311.0914, found: 311.0915.

**Diethyl 2-phenylfuran-3,4-dicarboxylate (3ba).** Colorless liquid, 20 mg, yield 56%,  $R_f$  = 0.64 (PE/EtOAc = 5/1, v/v). IR (KBr):  $\nu$  = 3150, 2983, 2938, 1728, 1578, 1447, 772, 704 cm<sup>-1</sup>. <sup>1</sup>H NMR (400 MHz, CDCl<sub>3</sub>):  $\delta$  7.96 (s, 1H, ArH), 7.71 (dd,  $J$  = 8.2, 1.6 Hz, 2H, ArH), 7.45–7.35 (m, 3H, ArH), 4.39 (q,  $J$  = 7.1 Hz, 2H), 4.32 (q,  $J$  = 7.1 Hz, 2H), 1.35 (t,  $J$  = 7.1 Hz, 6H). <sup>13</sup>C NMR (101 MHz, CDCl<sub>3</sub>):  $\delta$  164.4, 161.8, 153.7, 146.1, 129.3, 128.8, 128.6, 126.4, 120.1, 113.9, 61.8, 60.9, 14.2, 14.0. HR-MS (ESI)  $m/z$  [M+H]<sup>+</sup> calcd for C<sub>16</sub>H<sub>17</sub>O<sub>5</sub><sup>+</sup>: 289.1071, found: 289.1072.

**Diethyl 2-(4-methylphenyl)furan-3,4-dicarboxylate (3bb).** Colorless liquid, 20 mg, yield 56%,  $R_f$  = 0.64 (PE/EtOAc = 5/1, v/v). IR (KBr):  $\nu$  = 3151, 2984, 2938, 1729, 1608, 1508 cm<sup>-1</sup>. <sup>1</sup>H NMR (400 MHz, CDCl<sub>3</sub>):  $\delta$  7.94 (s, 1H, ArH), 7.61 (d,  $J$  = 8.2 Hz, 2H, ArH), 7.22 (d,  $J$  = 8.2 Hz, 2H, ArH), 4.37 (q,  $J$  = 7.1 Hz, 2H), 4.31 (q,  $J$  = 7.1 Hz, 2H), 2.38 (s, 3H), 1.35 (t,  $J$  = 7.1 Hz, 6H). <sup>13</sup>C NMR (101 MHz, CDCl<sub>3</sub>):  $\delta$  164.5, 161.9, 154.1, 145.8, 139.5, 129.3, 126.4, 126.1, 120.1, 113.3, 61.7, 60.8, 21.4, 14.2, 14.0. HR-MS (ESI)  $m/z$  [M+H]<sup>+</sup> calcd for C<sub>17</sub>H<sub>19</sub>O<sub>5</sub><sup>+</sup>: 303.1227, found: 303.1227.

**Diethyl 2-(4-bromophenyl)furan-3,4-dicarboxylate (3bf).** Emerald liquid, 31 mg, yield 68%,  $R_f$  = 0.64 (PE/EtOAc = 5/1, v/v). IR (KBr):  $\nu$  = 3148, 2983, 2937, 1727, 1586, 1487, 829 cm<sup>-1</sup>. <sup>1</sup>H NMR (400 MHz, CDCl<sub>3</sub>):  $\delta$  7.96 (s, 1H, ArH), 7.61 (d,  $J$  = 8.8 Hz, 2H, ArH), 7.55 (d,  $J$  = 8.8 Hz, 2H, ArH), 4.38 (q,  $J$  = 7.1 Hz, 2H), 4.32 (q,  $J$  = 7.1 Hz, 2H), 1.35 (t,  $J$  = 7.1 Hz, 6H). <sup>13</sup>C NMR (101 MHz, CDCl<sub>3</sub>):  $\delta$  164.2, 161.7, 152.8, 146.2, 131.9, 127.9, 127.7, 123.7, 120.3, 114.4, 61.9, 61.0, 14.2, 14.0. HR-MS (ESI)  $m/z$  [M+H]<sup>+</sup> calcd for C<sub>16</sub>H<sub>16</sub>BrO<sub>5</sub><sup>+</sup>: 367.0176, found: 367.0177.

**Ethyl 2-phenyl-4-(trifluoromethyl)furan-3-carboxylate (3ca).** Colorless liquid, 22 mg, yield 57%,  $R_f$  = 0.79 (PE/EtOAc = 10/1, v/v). IR (KBr):  $\nu$  = 3130, 2986, 2936, 1727, 1599, 1583, 1491, 765, 692 cm<sup>-1</sup>. <sup>1</sup>H NMR (400 MHz, CDCl<sub>3</sub>):  $\delta$  7.82–7.78 (m, 3H, ArH), 7.47–7.43 (m, 3H, ArH), 4.32 (q,  $J$  = 7.2 Hz, 2H), 1.31 (t,  $J$  = 7.1 Hz, 3H). <sup>13</sup>C NMR (101 MHz, CDCl<sub>3</sub>):  $\delta$  161.9, 159.5, 142.5 (q,  $J_{F-C}$  = 6.8 Hz), 130.1, 128.6, 128.5, 128.2, 121.7 (q,  $J_{F-C}$  = 267.4 Hz), 118.8 (q,  $J_{F-C}$  = 37.5 Hz), 111.2, 61.3, 13.7. <sup>19</sup>F NMR (377 MHz, CDCl<sub>3</sub>):  $\delta$  -58.9. HR-MS (ESI)  $m/z$  [M+H]<sup>+</sup> calcd for C<sub>14</sub>H<sub>12</sub>F<sub>3</sub>O<sub>3</sub><sup>+</sup>: 285.0733, found: 285.0725.

**Ethyl 2-(4-methylphenyl)-4-(trifluoromethyl)furan-3-carboxylate (3cb).** Colorless liquid, 20 mg, yield 54%,  $R_f$  = 0.66 (PE/EtOAc = 10/1, v/v). IR (KBr):  $\nu$  = 3129, 2986, 2928, 1726, 1615, 1578, 1505, 822 cm<sup>-1</sup>. <sup>1</sup>H NMR (400 MHz, CDCl<sub>3</sub>):  $\delta$  7.78 (q,  $J$  = 1.3 Hz, 1H, ArH), 7.72–7.69 (m, 2H, ArH), 7.25 (d,  $J$  = 8.0 Hz, 2H, ArH), 4.32 (q,  $J$  = 7.2 Hz, 2H), 2.40 (s, 3H), 1.32 (t,  $J$  = 7.1 Hz, 3H). <sup>13</sup>C NMR (101 MHz, CDCl<sub>3</sub>):  $\delta$  162.0, 159.9, 142.2 (q,  $J_{F-C}$  = 7.3 Hz), 140.4, 128.9, 128.5, 125.8, 121.8 (q,  $J_{F-C}$  = 267.5 Hz), 118.8 (q,  $J_{F-C}$  = 37.5 Hz), 110.7, 61.2, 21.5, 13.7. <sup>19</sup>F NMR (377 MHz, CDCl<sub>3</sub>):  $\delta$  -58.9. HR-MS (ESI)  $m/z$  [M+H]<sup>+</sup> calcd for C<sub>15</sub>H<sub>14</sub>F<sub>3</sub>O<sub>3</sub><sup>+</sup>: 299.0890, found: 299.0889.

**Ethyl 2-(4-bromophenyl)-4-(trifluoromethyl)furan-3-carboxylate (3cf).** Light Green liquid, 20 mg, yield 44%,  $R_f$  = 0.66 (PE/EtOAc = 5/1, v/v). IR (KBr):  $\nu$  = 2986, 2929, 1726, 1592, 1575, 1505, 822 cm<sup>-1</sup>. <sup>1</sup>H NMR (400 MHz, CDCl<sub>3</sub>):  $\delta$  7.84 (s, 1H, ArH), 7.75 (d,  $J$  = 8.6 Hz, 2H, ArH), 7.61 (d,  $J$  = 8.6 Hz, 2H, ArH), 4.35 (q,  $J$  = 7.1 Hz, 2H), 1.36 (t,  $J$  = 7.1 Hz, 3H). <sup>13</sup>C NMR (101 MHz, CDCl<sub>3</sub>):  $\delta$  161.7, 158.4, 142.7 (q,  $J_{F-C}$  = 6.8 Hz), 131.5, 130.0, 127.4, 124.7, 121.6 (q,  $J_{F-C}$  = 267.5 Hz), 119.0 (q,  $J_{F-C}$  = 37.7 Hz), 111.7, 61.5, 13.7. <sup>19</sup>F NMR (377 MHz, CDCl<sub>3</sub>):  $\delta$  -58.9. HR-MS (ESI)  $m/z$  [M+H]<sup>+</sup> calcd for C<sub>14</sub>H<sub>11</sub>BrF<sub>3</sub>O<sub>3</sub><sup>+</sup>: 362.9838, found: 362.9832.

**2-Ethyl 3,4-dimethyl 5-phenylfuran-2,3,4-tricarboxylate (3am).** Golden yellow liquid, 17 mg, yield 52%,  $R_f$  = 0.18 (PE/EtOAc = 10/1, v/v). IR (KBr):  $\nu$  = 2987, 2953, 1733, 1580, 1598, 1446, 774, 696 cm<sup>-1</sup>. <sup>1</sup>H NMR (400 MHz, CDCl<sub>3</sub>):  $\delta$  7.96–7.90 (m, 2H, ArH), 7.52–7.42 (m, 3H, ArH), 4.39 (q,  $J$  = 7.2 Hz, 2H), 3.97 (s, 3H), 3.82 (s, 3H), 1.38 (t,  $J$  = 7.1 Hz, 3H). <sup>13</sup>C NMR (101 MHz, CDCl<sub>3</sub>):  $\delta$  163.5, 161.8, 159.6, 157.2, 139.9, 130.9, 129.1, 128.3, 127.9, 127.1, 113.6, 61.8, 53.0, 52.3, 14.1. HR-MS (ESI)  $m/z$  [M+H]<sup>+</sup> calcd for C<sub>17</sub>H<sub>17</sub>O<sub>7</sub><sup>+</sup>: 333.0969, found: 333.0963.

**Trimethyl 5-methylfuran-2,3,4-tricarboxylate (3an).**<sup>3</sup> Light yellow solid, m.p. 94–96 °C, 19 mg, yield 75%,  $R_f$  = 0.36 (PE/EtOAc = 3/1, v/v). <sup>1</sup>H NMR (400 MHz, CDCl<sub>3</sub>):  $\delta$  3.95 (s, 3H), 3.90 (s, 3H), 3.84 (s, 3H), 2.66 (s, 3H). <sup>13</sup>C NMR (101 MHz, CDCl<sub>3</sub>):  $\delta$  163.6, 162.3, 162.0, 157.6, 138.9, 126.1, 114.0, 53.0, 52.5, 52.1, 14.2.

**Triethyl 5-phenylfuran-2,3,4-tricarboxylate (3bm).** Light green liquid, 17 mg, yield 48%,  $R_f$  = 0.19 (PE/EtOAc = 10/1, v/v). IR (KBr):  $\nu$  = 2984, 2937, 1732, 1580, 1597, 1490, 774, 694 cm<sup>-1</sup>. <sup>1</sup>H NMR (400 MHz, CDCl<sub>3</sub>):  $\delta$  7.97–7.92 (m, 2H, ArH), 7.51–7.41 (m, 3H, ArH), 4.43 (q,  $J$  = 7.1 Hz, 2H), 4.39 (q,  $J$  = 7.1 Hz, 2H), 4.29 (q,  $J$  = 7.1 Hz, 2H), 1.42 (t,  $J$  = 7.1 Hz, 3H), 1.38 (t,  $J$  = 7.1 Hz, 3H), 1.29 (t,  $J$  = 7.1 Hz, 3H). <sup>13</sup>C NMR (101 MHz, CDCl<sub>3</sub>):  $\delta$  163.1, 161.4, 159.5, 157.3, 139.7, 130.8, 129.2, 128.2, 128.0, 127.4, 113.9, 62.1, 61.7, 61.3, 14.2, 14.0, 13.9. HR-MS (ESI)  $m/z$  [M+H]<sup>+</sup> calcd for C<sub>19</sub>H<sub>21</sub>O<sub>7</sub><sup>+</sup>: 361.1282, found: 361.1284.

**3,4-Diethyl 2-methyl 5-methylfuran-2,3,4-tricarboxylate (3bn).** Colorless liquid, 17 mg, yield 61%,  $R_f$  = 0.21 (PE/EtOAc = 10/1, v/v). IR (KBr):  $\nu$  = 2984, 1723, 1600, 1564, 1440, 1388 cm<sup>-1</sup>. <sup>1</sup>H NMR (400 MHz,

CDCl<sub>3</sub>):  $\delta$  4.41 (q,  $J$  = 7.1 Hz, 2H), 4.30 (q,  $J$  = 7.1 Hz, 2H), 3.89 (s, 3H), 2.66 (s, 3H), 1.39 (t,  $J$  = 7.1 Hz, 3H), 1.33 (t,  $J$  = 7.1 Hz, 3H). <sup>13</sup>C NMR (101 MHz, CDCl<sub>3</sub>):  $\delta$  163.1, 162.2, 161.6, 157.6, 138.8, 126.4, 114.1, 62.1, 61.0, 52.4, 14.1, 14.0. HR-MS (ESI)  $m/z$  [M+H]<sup>+</sup> calcd for C<sub>13</sub>H<sub>17</sub>O<sub>7</sub><sup>+</sup>: 285.0969, found: 285.0970.

**Methyl 2-phenylfuran-3-carboxylate (3da).**<sup>4</sup> Colorless liquid, 8 mg, yield 15%,  $R_f$  = 0.54 (PE/EtOAc = 10/1, v/v). <sup>1</sup>H NMR (400 MHz, CDCl<sub>3</sub>):  $\delta$  8.00–7.95 (m, 2H), 7.48–7.37 (m, 4H), 6.84 (d,  $J$  = 2.0 Hz, 1H), 3.83 (s, 3H). <sup>13</sup>C NMR (101 MHz, CDCl<sub>3</sub>):  $\delta$  164.0, 157.6, 141.2, 129.7, 129.4, 128.3, 128.1, 113.5, 112.9, 51.61.

**2-Ethyl 4-methyl 5-phenylfuran-2,4-dicarboxylate (3dm).** White solid, m.p. 98–100 °C. 4 mg, yield 15%,  $R_f$  = 0.63 (PE/EtOAc = 3/1, v/v). IR (KBr):  $\nu$  = 2983, 2954, 1726, 1594, 1577, 1490, 1447, 764, 692 cm<sup>-1</sup>. <sup>1</sup>H NMR (400 MHz, CDCl<sub>3</sub>):  $\delta$  8.11–8.02 (m, 2H, ArH), 7.57 (s, 1H, ArH), 7.48–7.45 (m, 3H, ArH), 4.40 (q,  $J$  = 7.1 Hz, 2H), 3.86 (s, 3H), 1.40 (t,  $J$  = 7.1 Hz, 3H). <sup>13</sup>C NMR (101 MHz, CDCl<sub>3</sub>):  $\delta$  163.0, 160.2, 158.3, 142.9, 130.5, 128.9, 128.6, 128.2, 120.2, 115.1, 61.3, 51.9, 14.3. HR-MS (ESI)  $m/z$  [M+H]<sup>+</sup> calcd for C<sub>15</sub>H<sub>15</sub>O<sub>5</sub><sup>+</sup>: 275.0914, found: 275.0917.

**4-Ethyl 2-methyl 5-methylfuran-2,4-dicarboxylate (3en).**<sup>5</sup> Colorless liquid, 10 mg, yield 48%,  $R_f$  = 0.45 (PE/EtOAc = 10/1, v/v). IR (KBr):  $\nu$  = 2956, 1720, 1604 cm<sup>-1</sup>. <sup>1</sup>H NMR (400 MHz, CDCl<sub>3</sub>):  $\delta$  7.41 (s, 1H), 4.31 (q,  $J$  = 7.1 Hz, 2H), 3.90 (s, 3H), 2.66 (s, 3H), 1.36 (t,  $J$  = 7.1 Hz, 3H). <sup>13</sup>C NMR (101 MHz, CDCl<sub>3</sub>):  $\delta$  162.9, 162.7, 158.7, 142.1, 118.7, 115.78, 60.6, 52.1, 14.3, 14.2. HR-MS (ESI)  $m/z$  [M+H]<sup>+</sup> calcd for C<sub>10</sub>H<sub>13</sub>O<sub>5</sub><sup>+</sup>: 213.0757, found: 285.0970.

## References

- 1 M. Fan, Z. Yan, W. Liu and Y. Liang, *J. Org. Chem.*, 2005, **70**, 8204-8207.
- 2 T. Aoyama, Y. Hari and T. Iguchi, *Synthesis*, 2004, 1359-1362
- 3 D. L. Whitehouse, K. H. Nelson, J. S. N. Savinov, R. S. Löwe and D. J. Austin, *Bioorg. Med. Chem.*, 1998, **6**, 1273-1282.
- 4 J.-T. Yu, B. Shi, H. Peng, S. Sun, H. Chu, Y. Jiang and J. Cheng, *Org. Lett.*, 2015, **17**, 3643-3645.
- 5 X. Cui, X. Xu, L. Wojtas, M. M. Kim and X. P. Zhang, *J. Am. Chem. Soc.*, 2012, **134**, 19981-19984.

### Copies of <sup>1</sup>H and <sup>13</sup>C NMR spectra of furan products 3

<sup>1</sup>H NMR (400 MHz, CDCl<sub>3</sub>) of compound 3aa

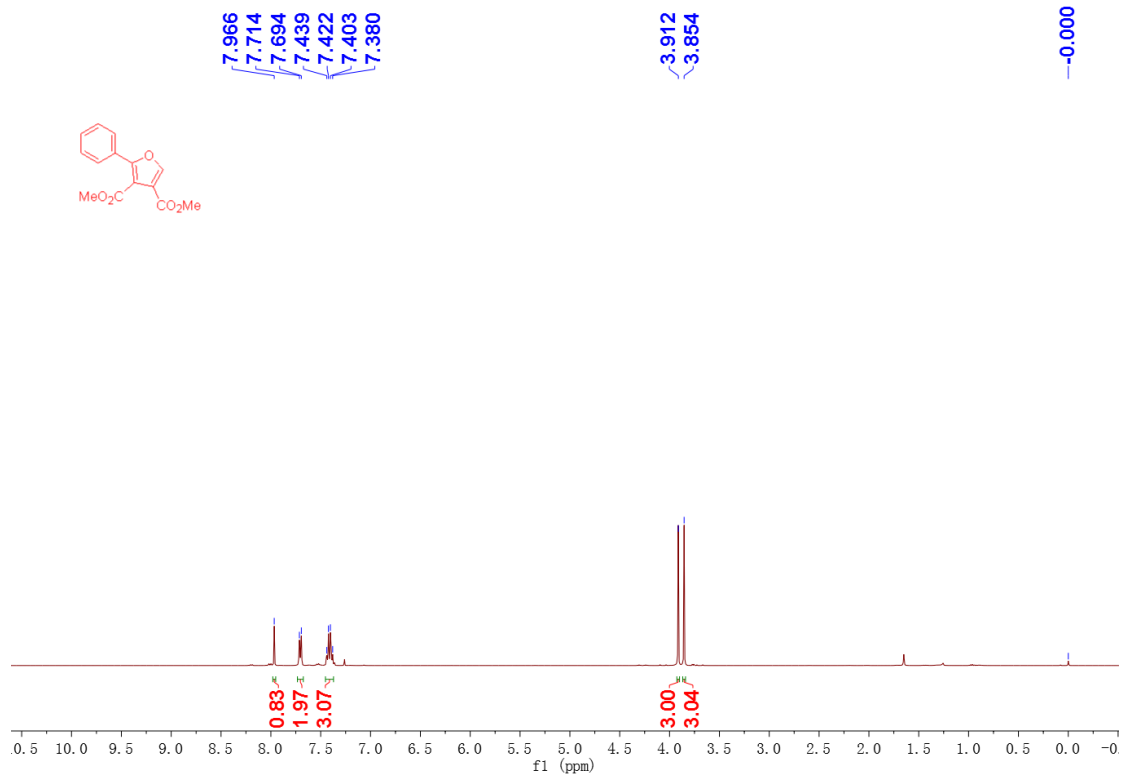

<sup>13</sup>C NMR (101 MHz, CDCl<sub>3</sub>)

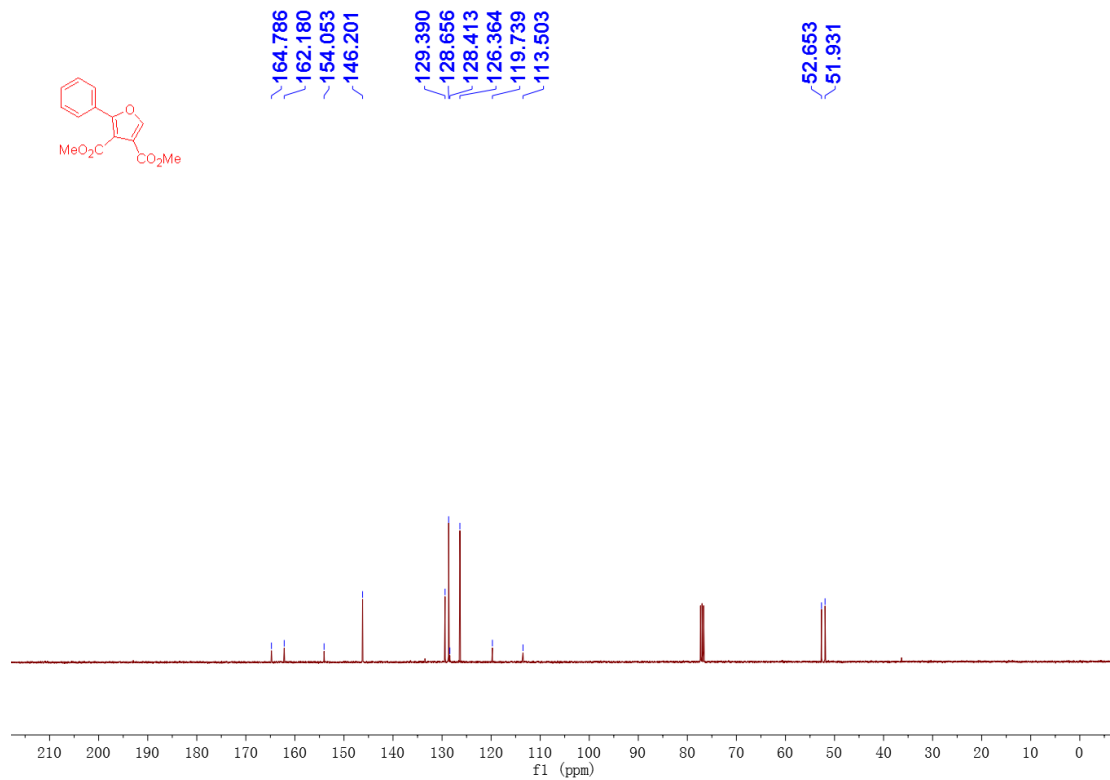

<sup>1</sup>H NMR (400 MHz, CDCl<sub>3</sub>) of compound **3ab**

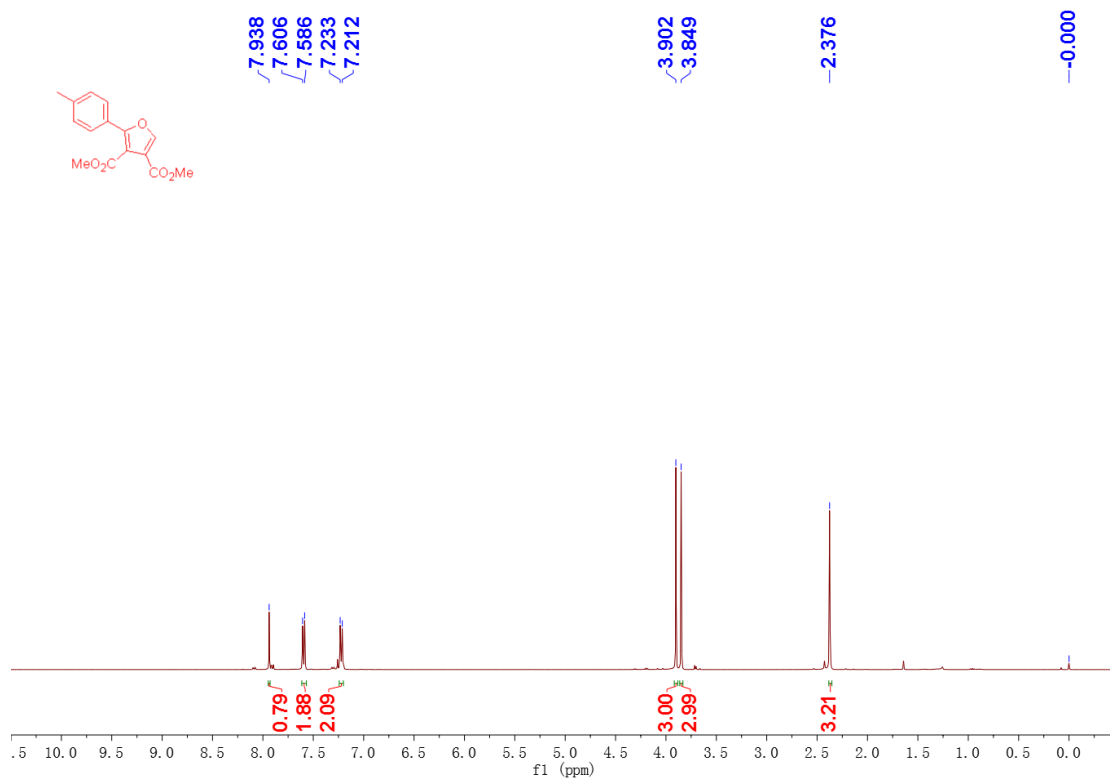

<sup>13</sup>C NMR (101 MHz, CDCl<sub>3</sub>)

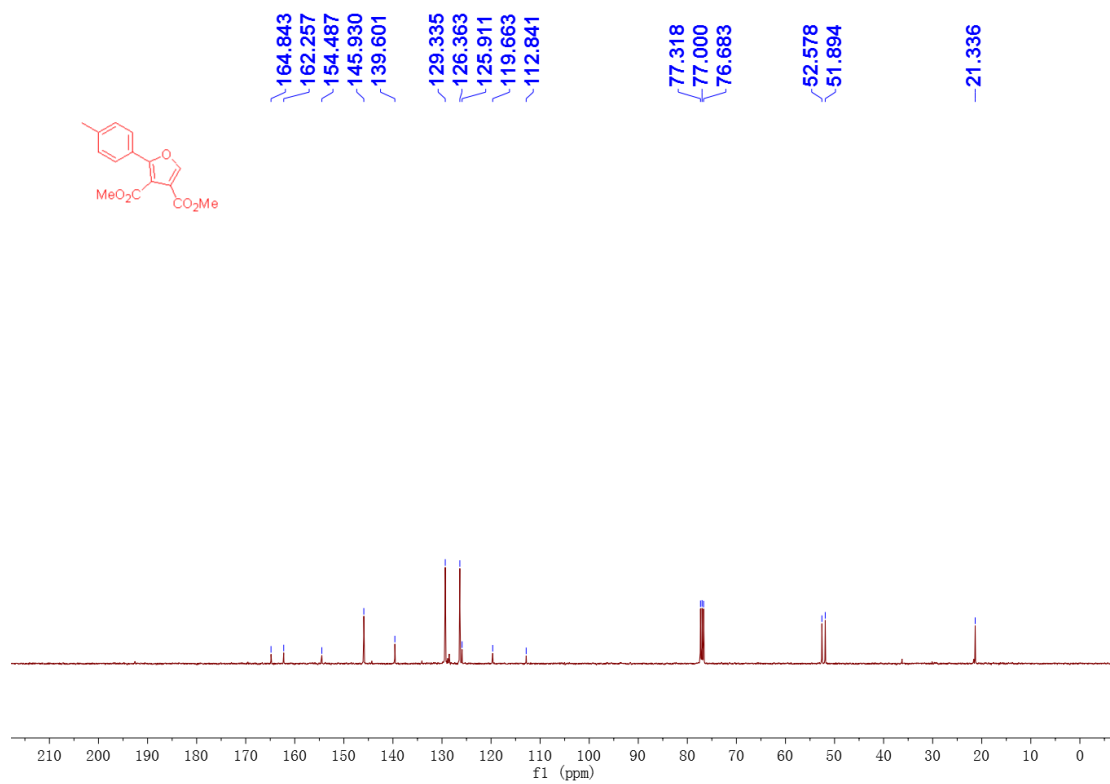

<sup>1</sup>H NMR (400 MHz, CDCl<sub>3</sub>) of compound **3ac**

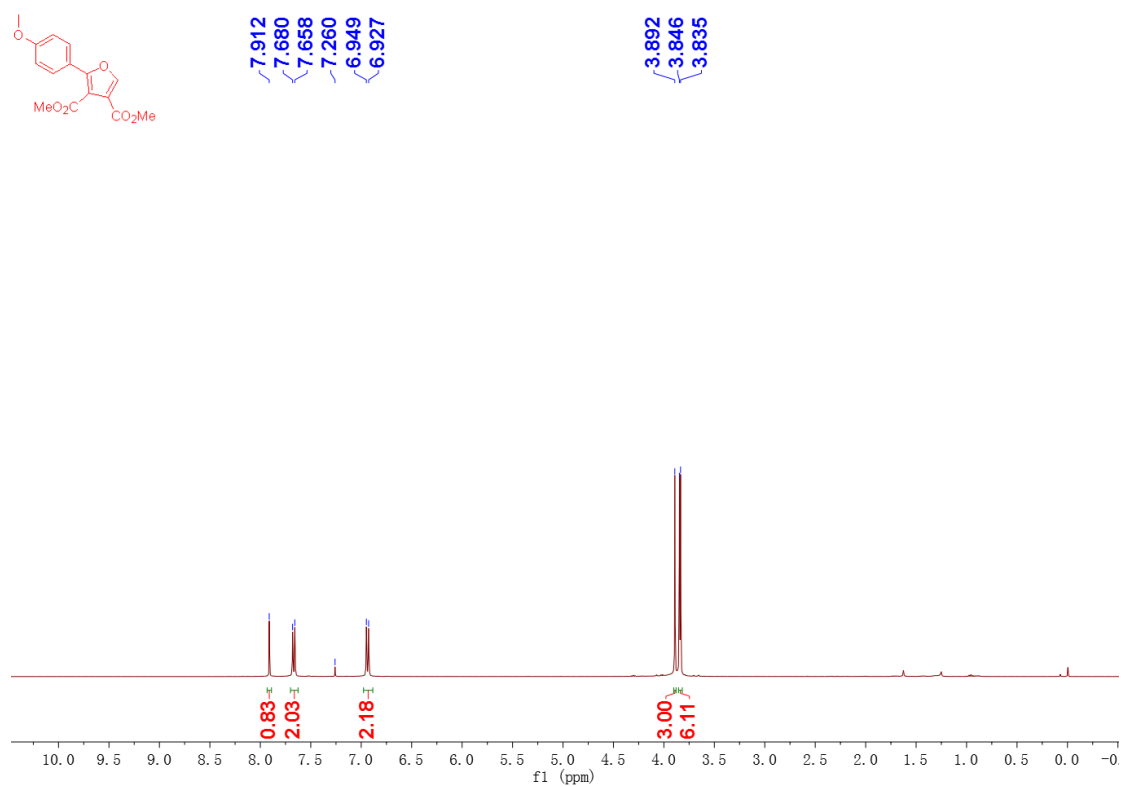

<sup>13</sup>C NMR (101 MHz, CDCl<sub>3</sub>)

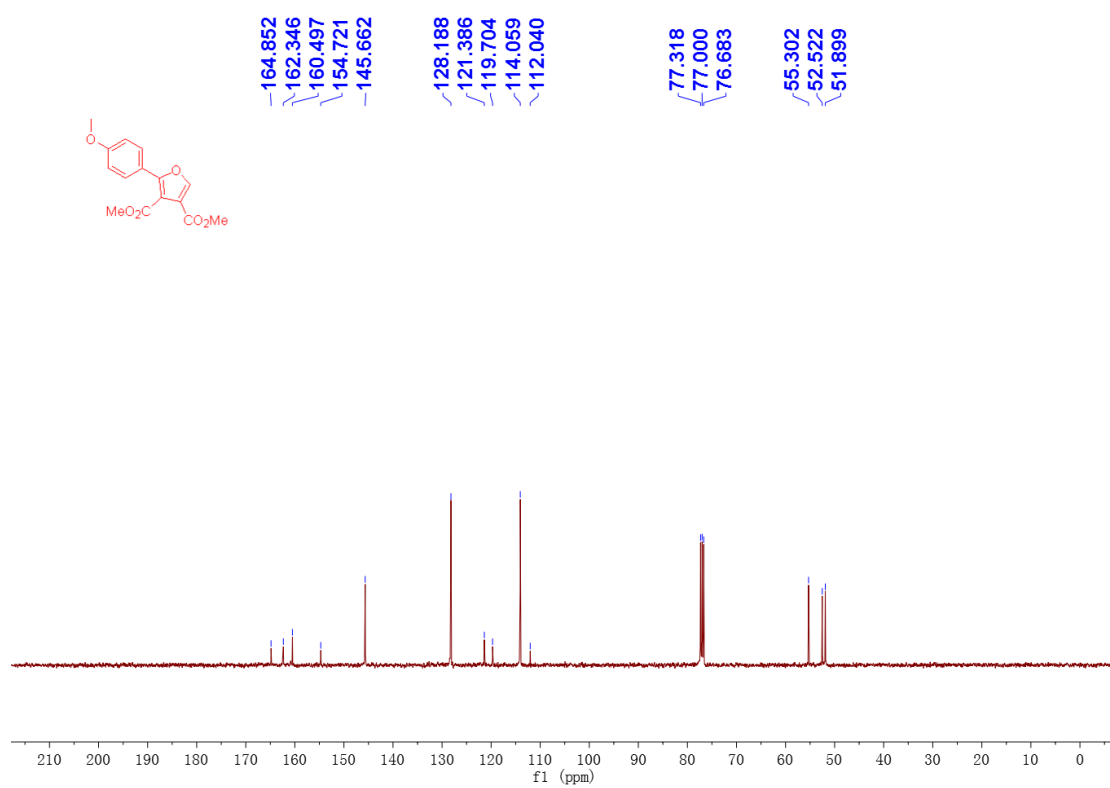

<sup>1</sup>H NMR (400 MHz, CDCl<sub>3</sub>) of compound **3ad**

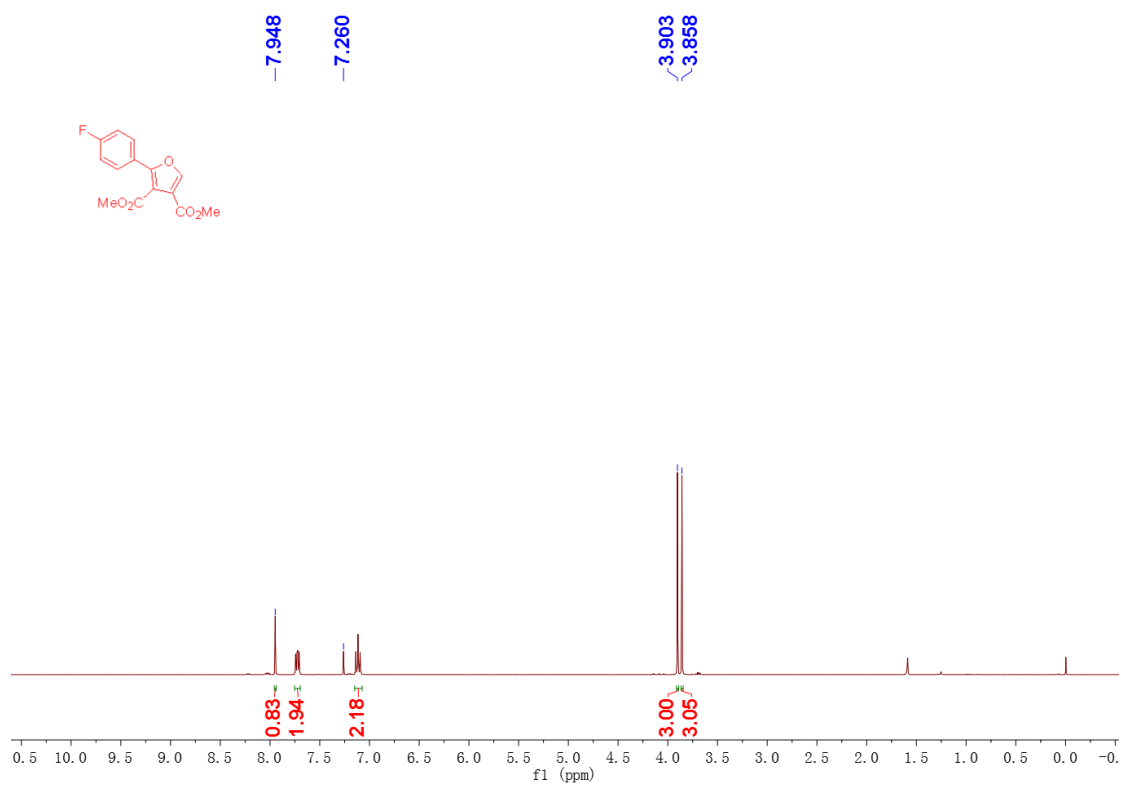

<sup>13</sup>C NMR (101 MHz, CDCl<sub>3</sub>)

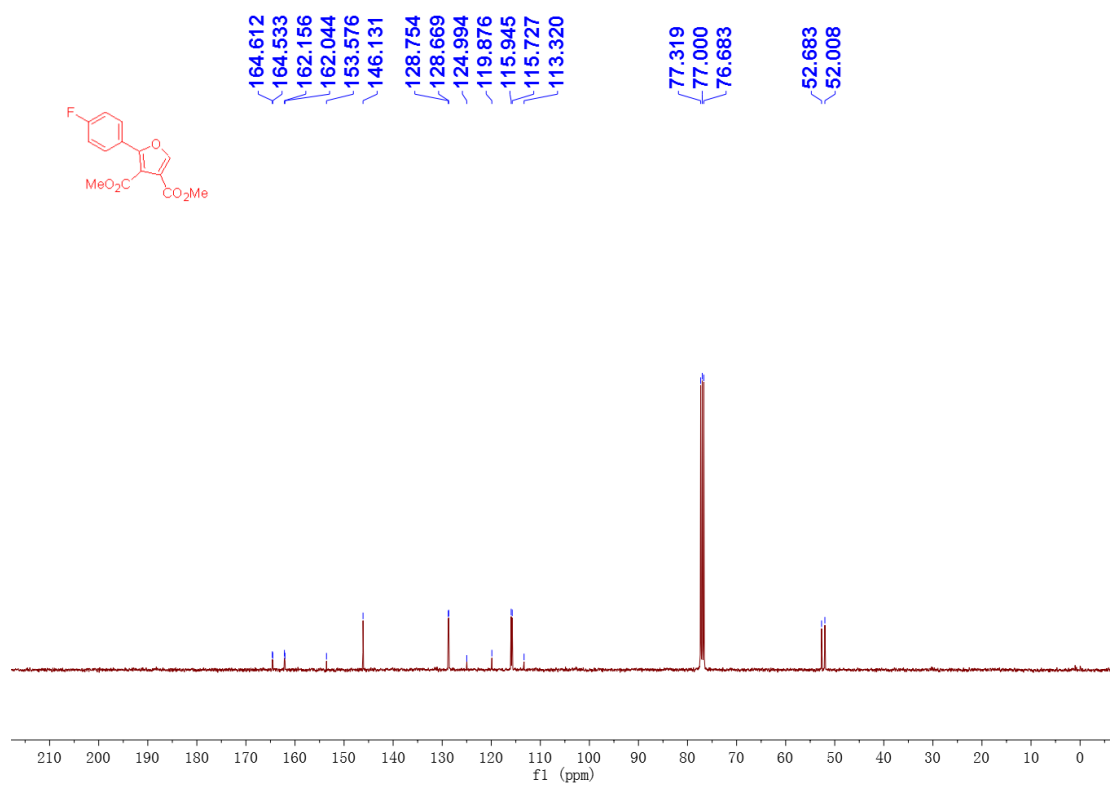



$^{19}\text{F}$  NMR (377 MHz,  $\text{CDCl}_3$ )

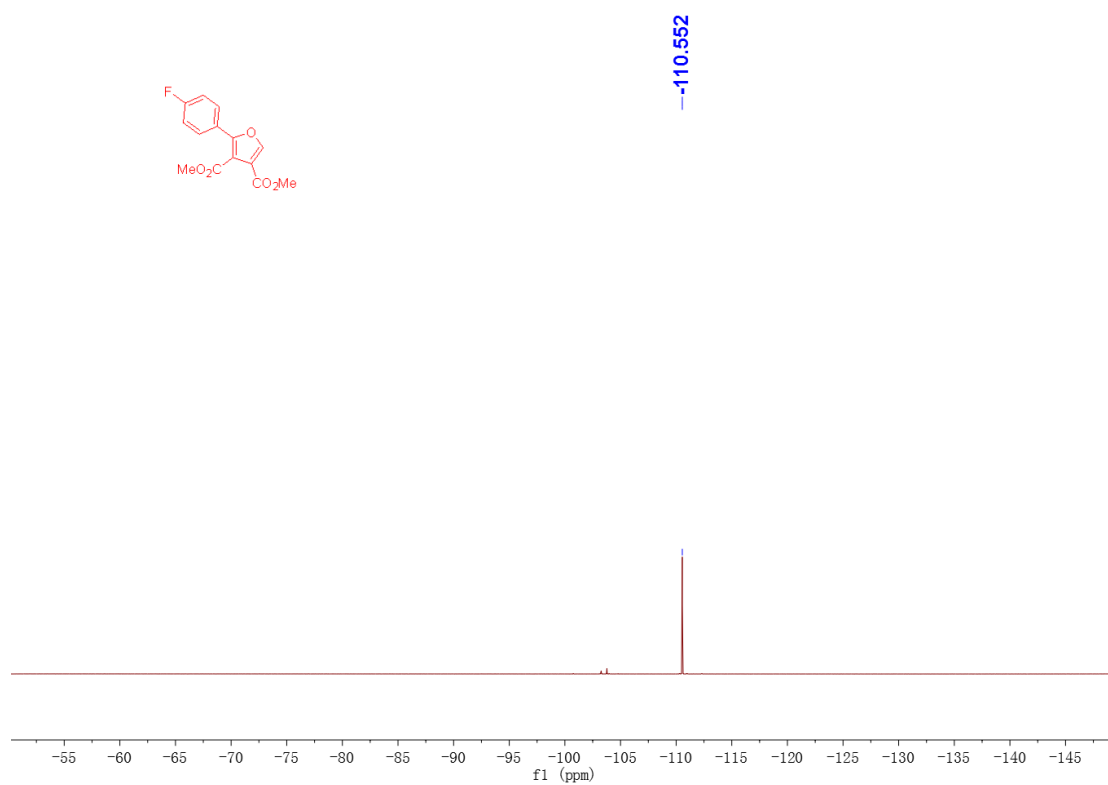

$^1\text{H}$  NMR (400 MHz,  $\text{CDCl}_3$ ) of compound 3ae

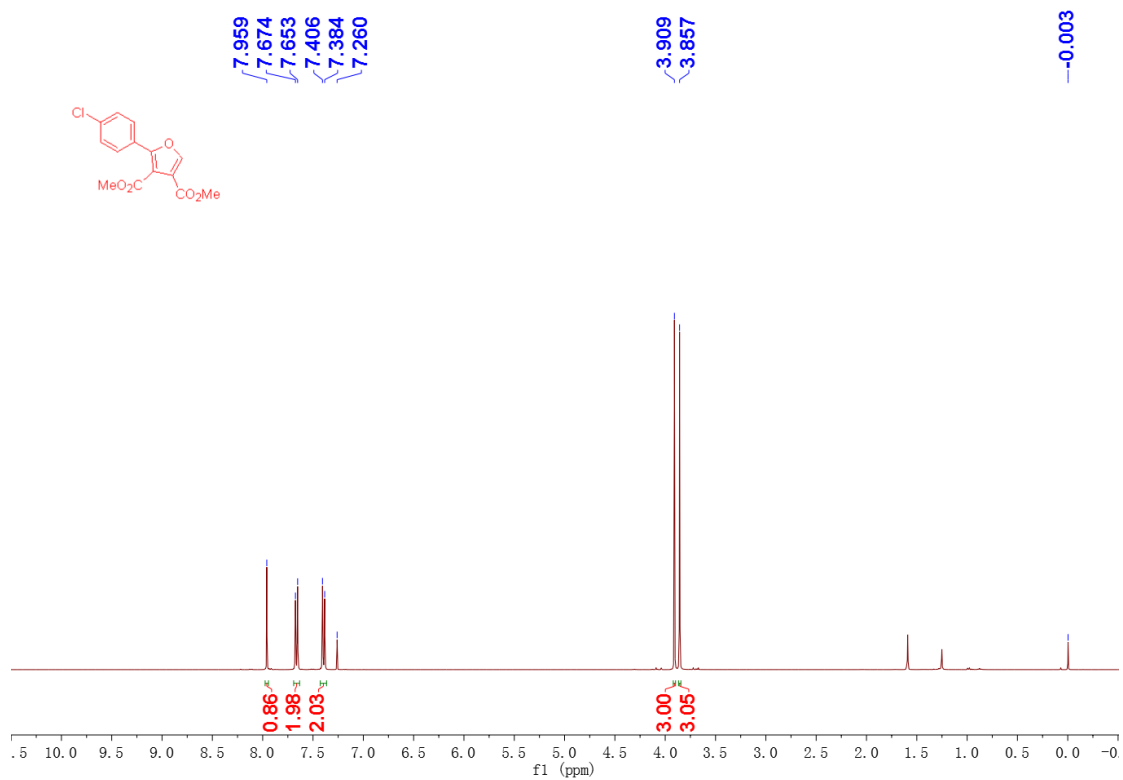

<sup>13</sup>C NMR (101 MHz, CDCl<sub>3</sub>)

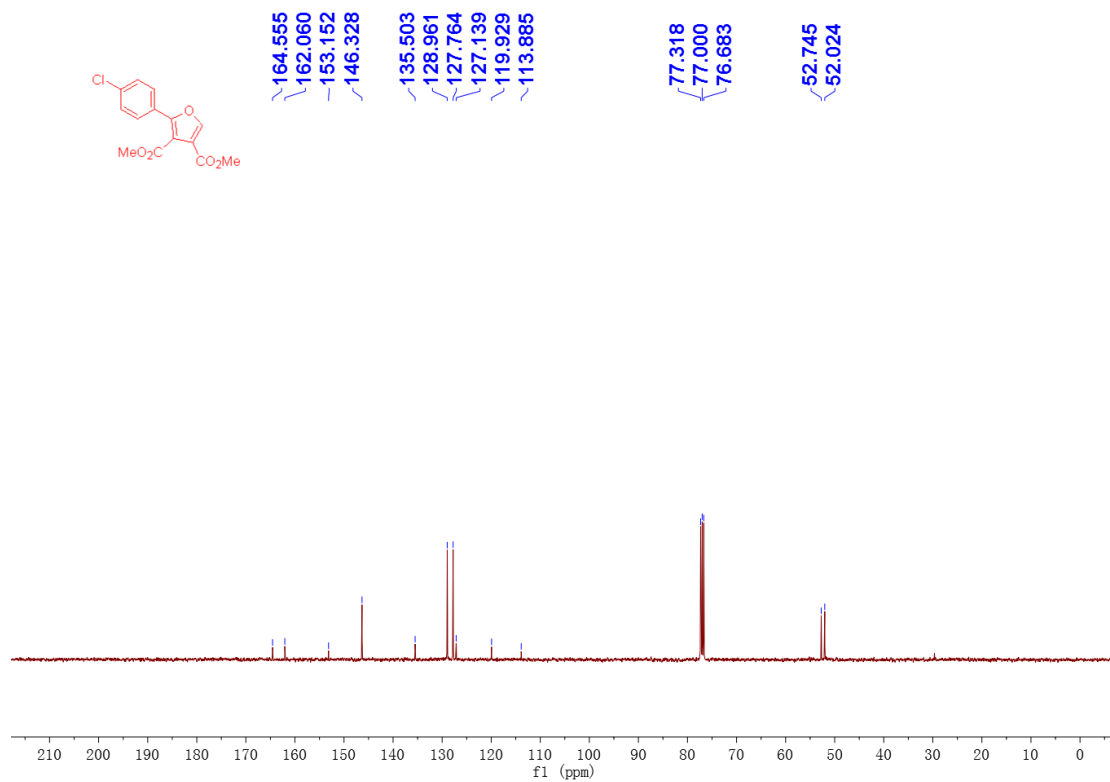

<sup>1</sup>H NMR (400 MHz, CDCl<sub>3</sub>) of compound 3af

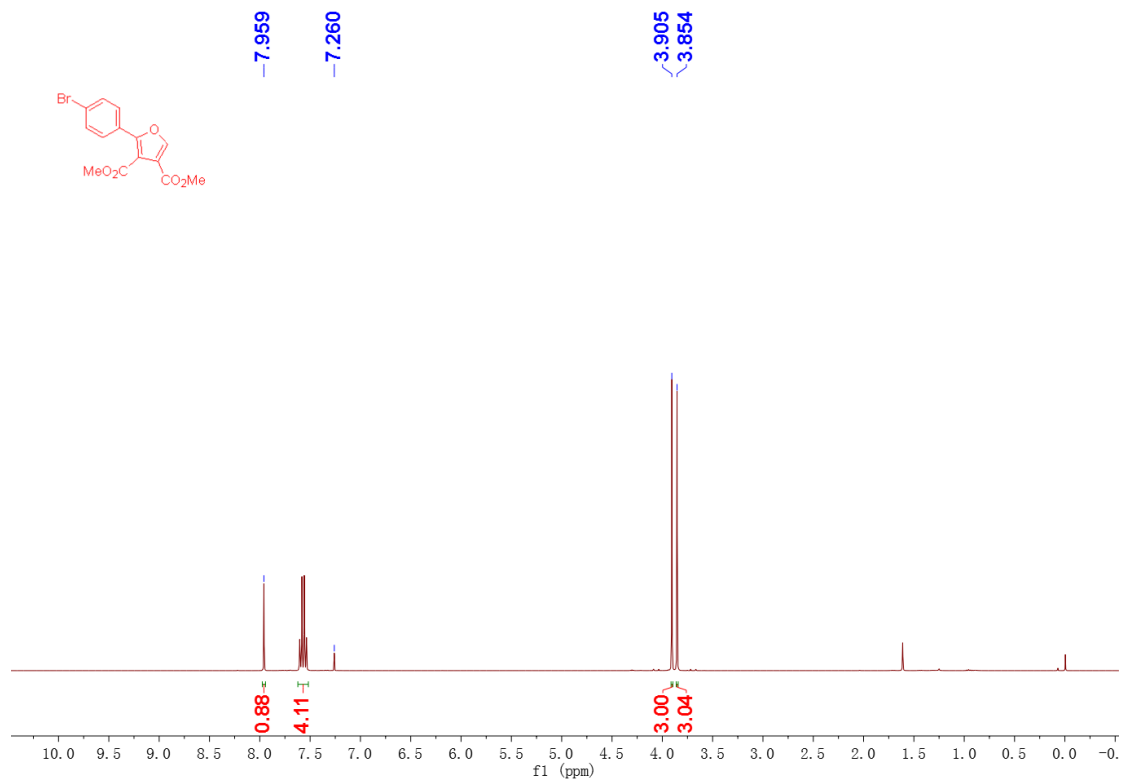

<sup>13</sup>C NMR (101 MHz, CDCl<sub>3</sub>)

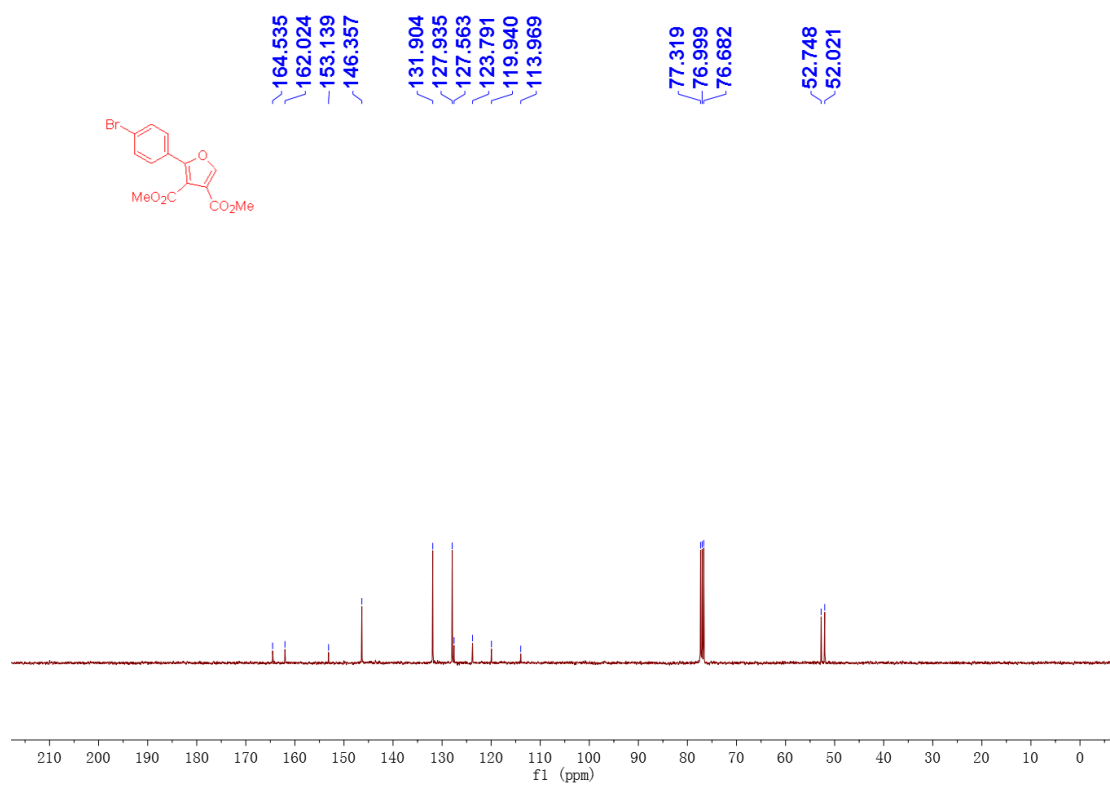

<sup>1</sup>H NMR (400 MHz, CDCl<sub>3</sub>) of compound **3ag**

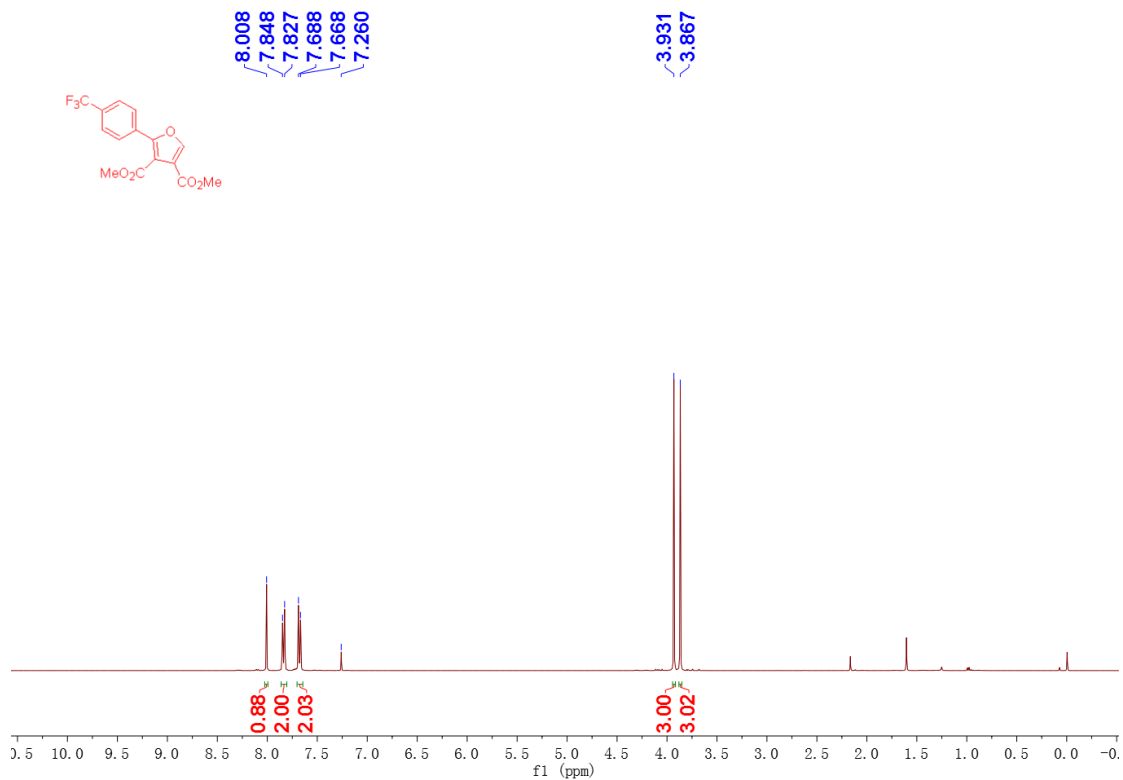

<sup>13</sup>C NMR (101 MHz, CDCl<sub>3</sub>)

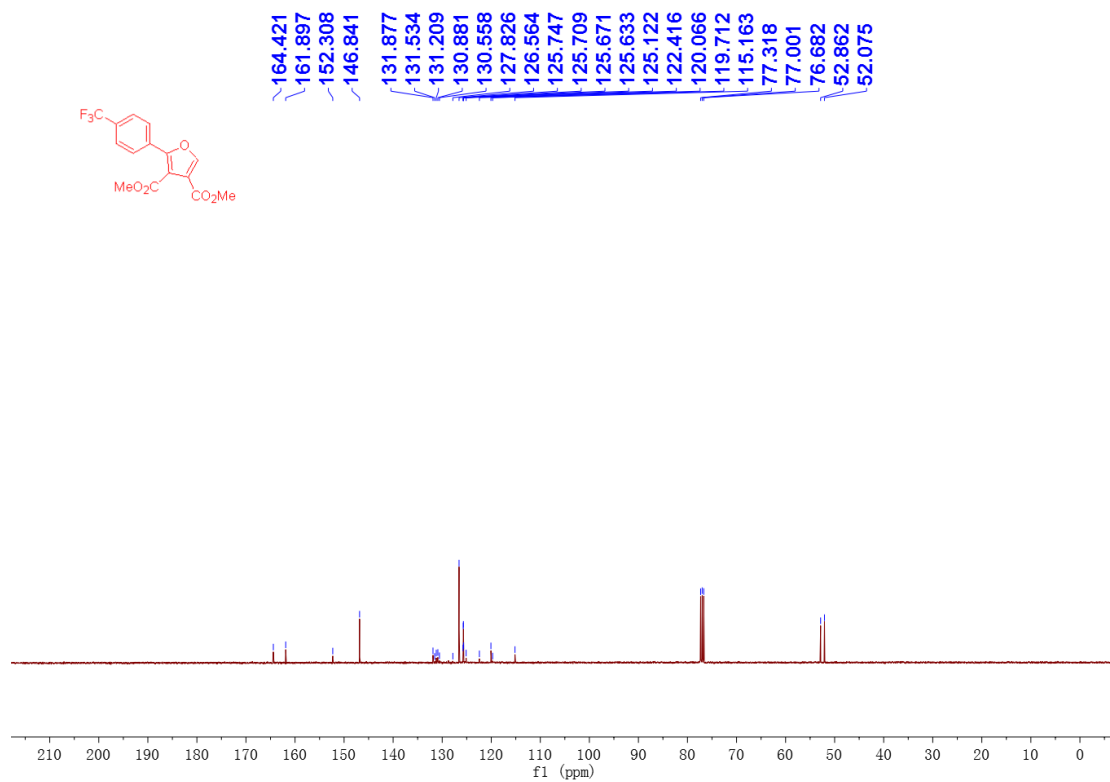

<sup>19</sup>F NMR (377 MHz, CDCl<sub>3</sub>)

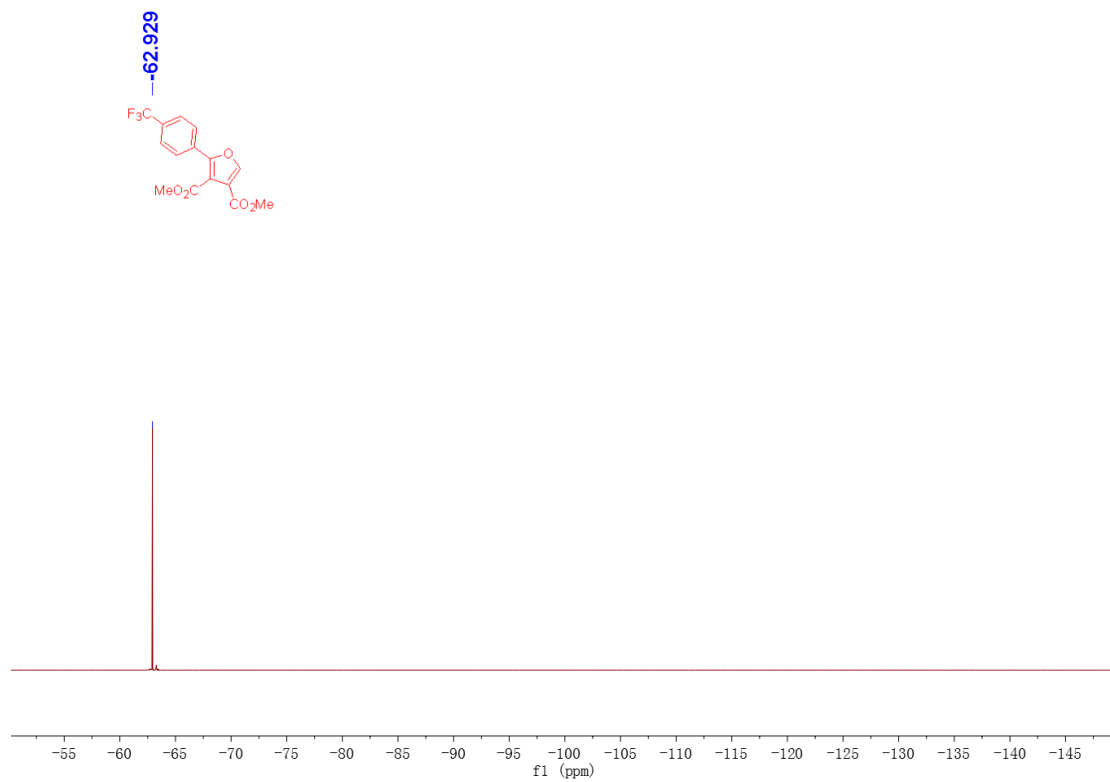

<sup>1</sup>H NMR (400 MHz, CDCl<sub>3</sub>) of compound **3ah**

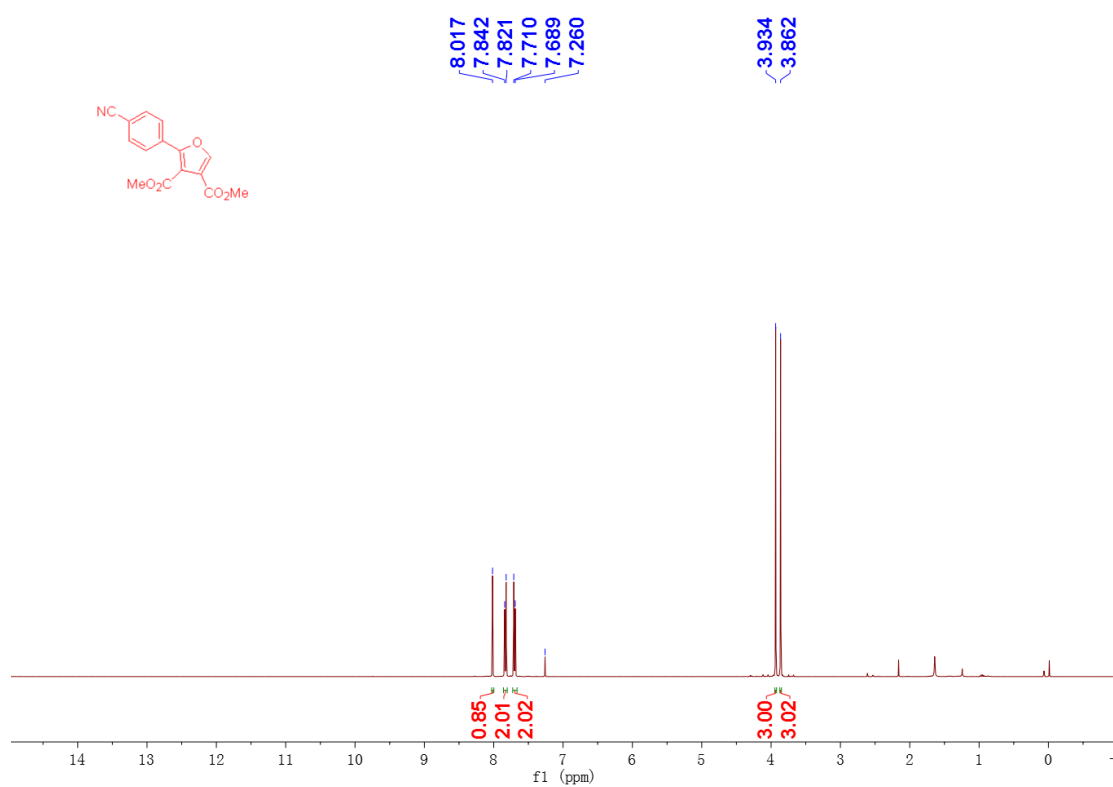

<sup>13</sup>C NMR (101 MHz, CDCl<sub>3</sub>)

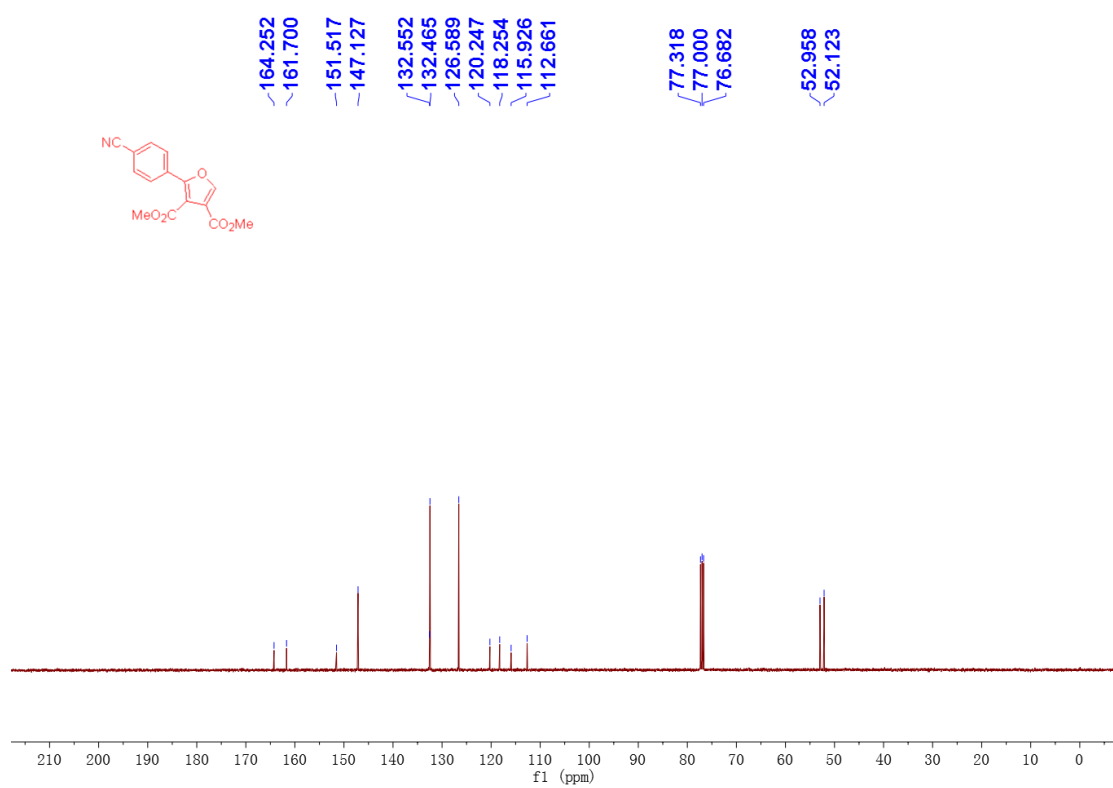

<sup>1</sup>H NMR (400 MHz, CDCl<sub>3</sub>) of compound **3ai**

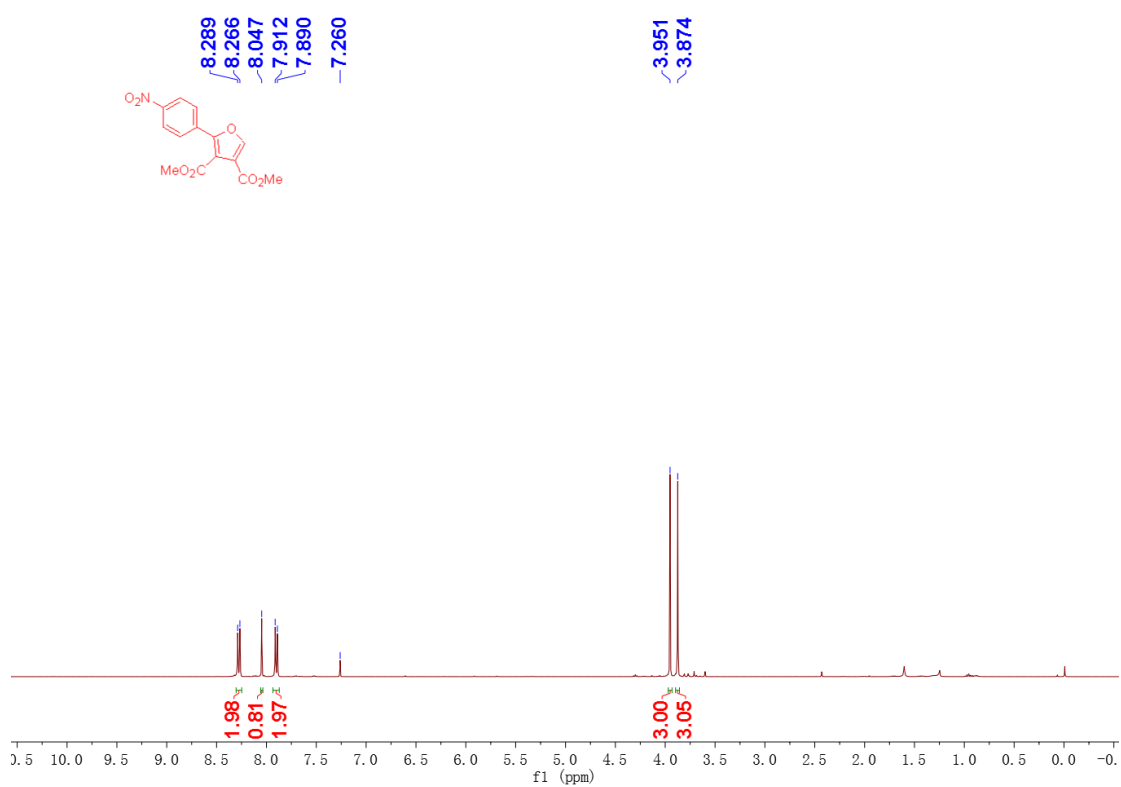

<sup>13</sup>C NMR (101 MHz, CDCl<sub>3</sub>)

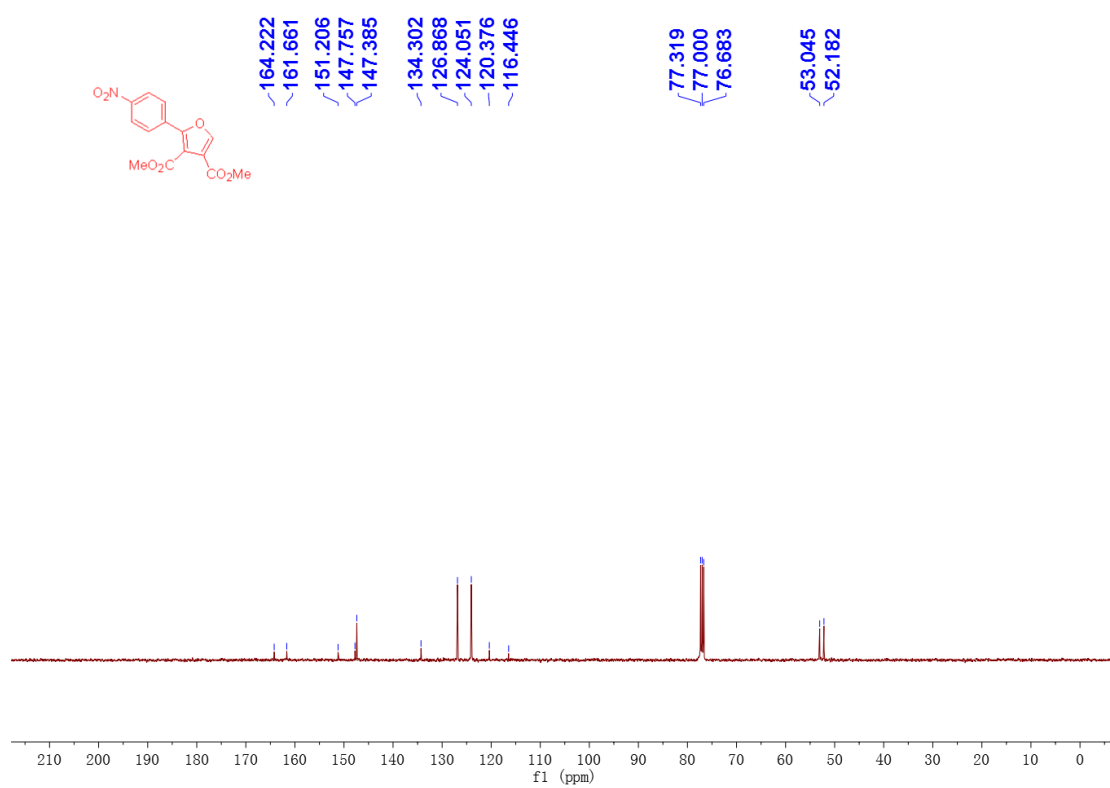

<sup>1</sup>H NMR (400 MHz, CDCl<sub>3</sub>) of compound **3aj**

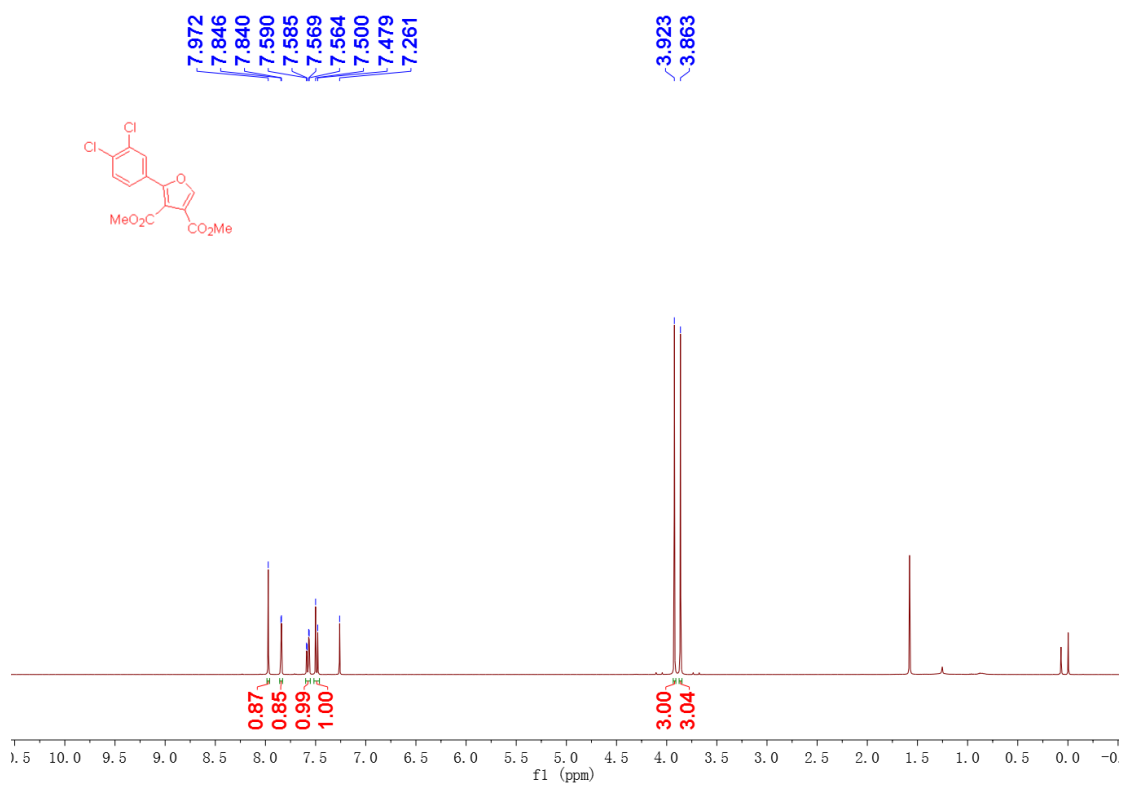

<sup>13</sup>C NMR (101 MHz, CDCl<sub>3</sub>)

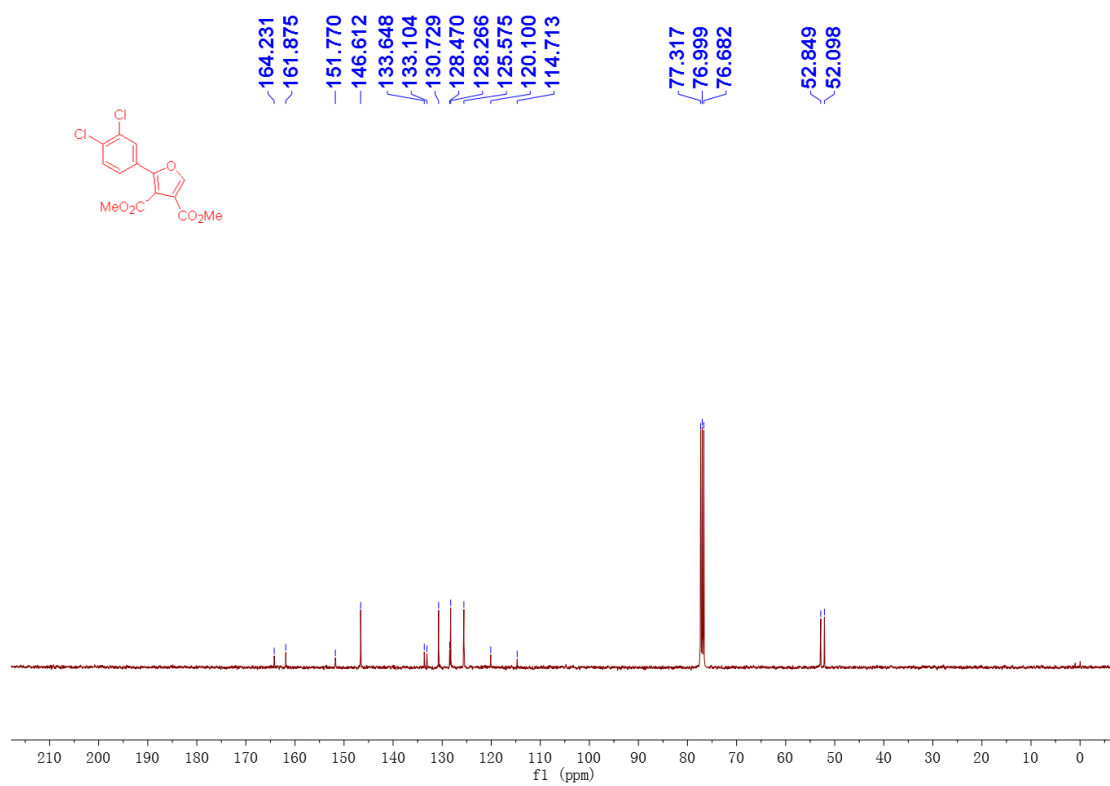

<sup>1</sup>H NMR (400 MHz, CDCl<sub>3</sub>) of compound **3ak**

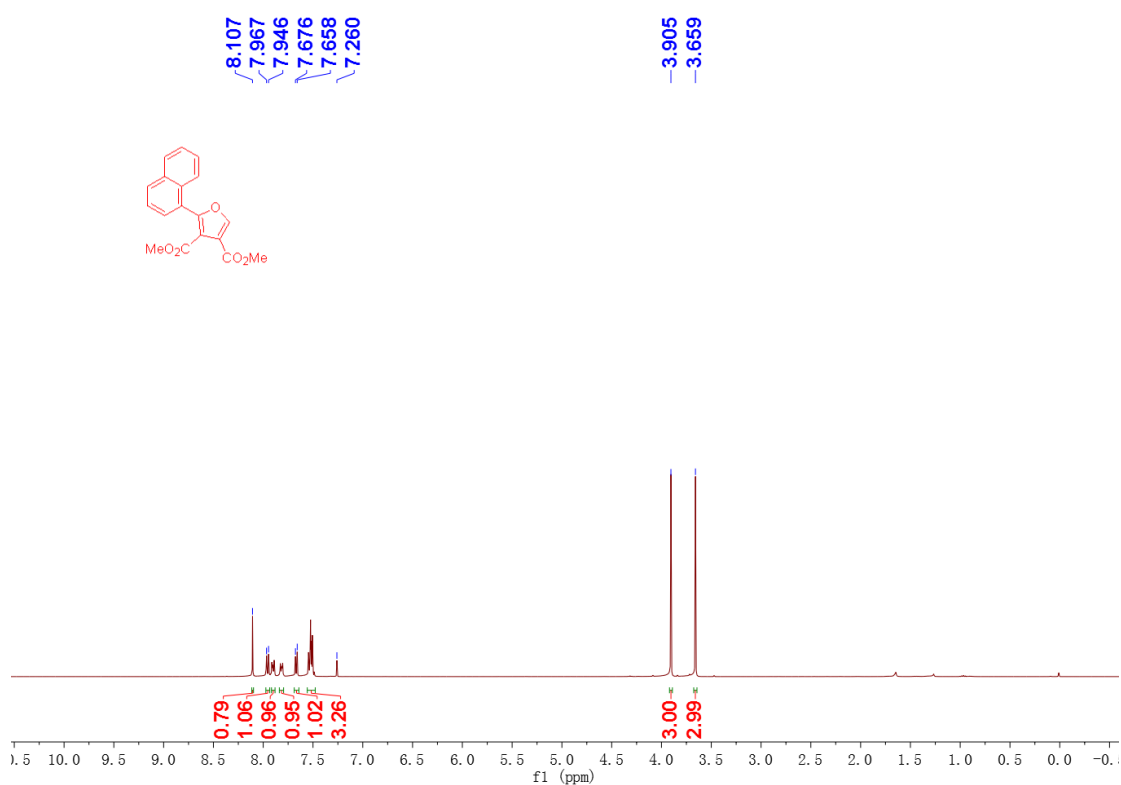

<sup>13</sup>C NMR (101 MHz, CDCl<sub>3</sub>)

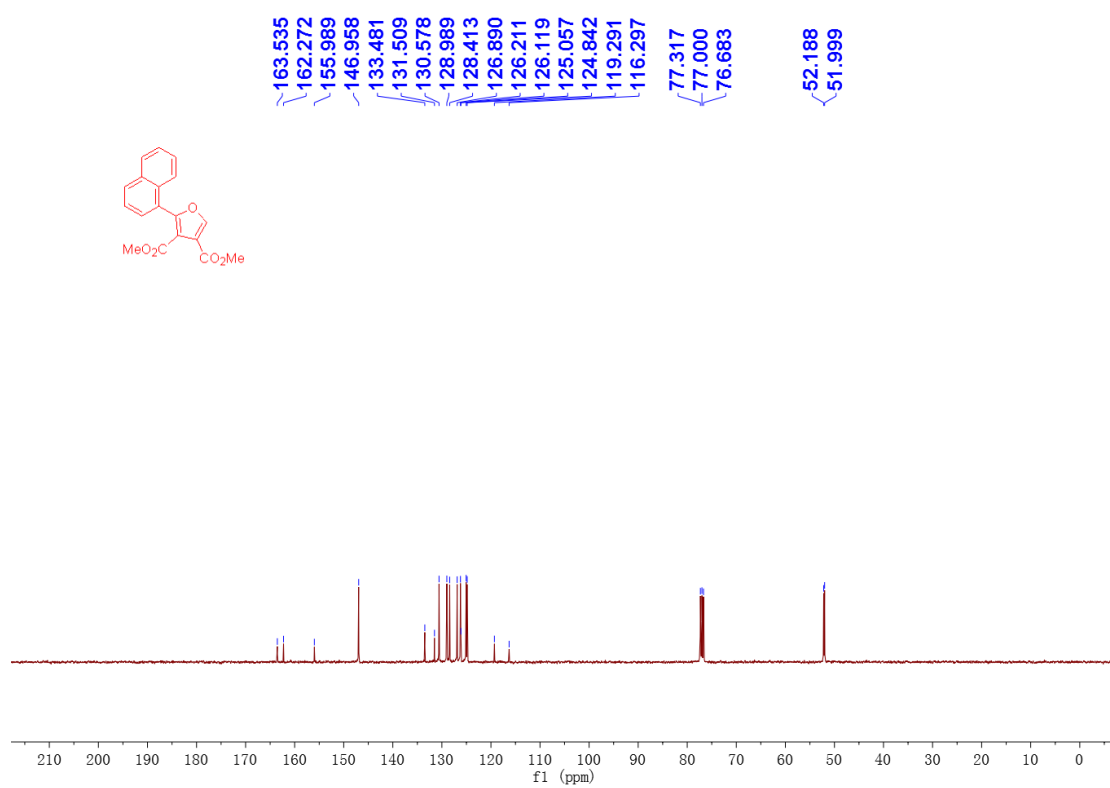



<sup>1</sup>H NMR (400 MHz, CDCl<sub>3</sub>) of compound **3a**

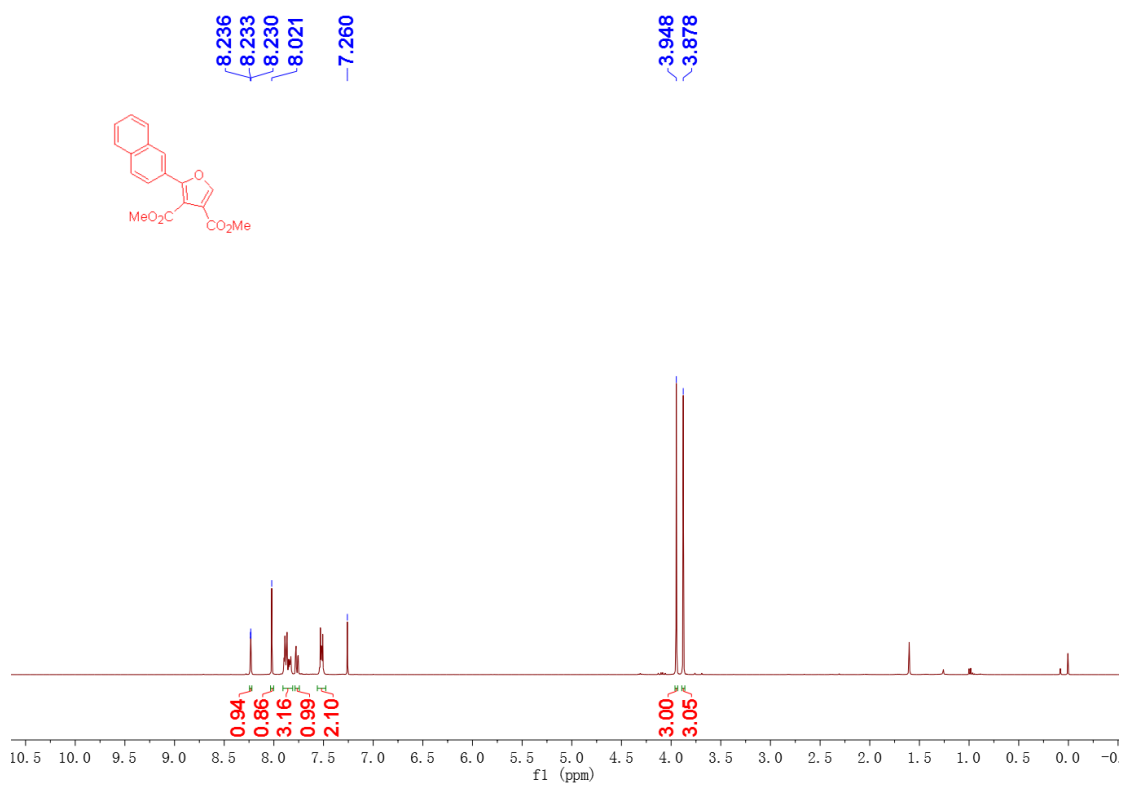

<sup>13</sup>C NMR (101 MHz, CDCl<sub>3</sub>)

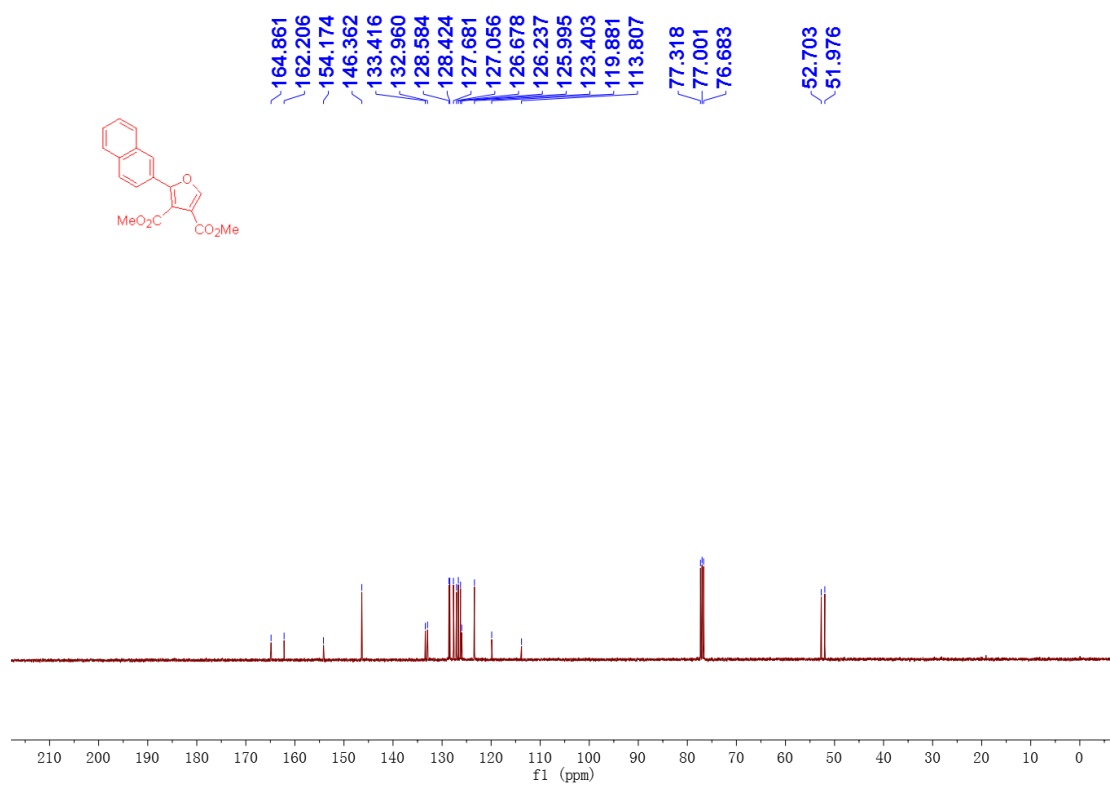

<sup>1</sup>H NMR (400 MHz, CDCl<sub>3</sub>) of compound **3ba**

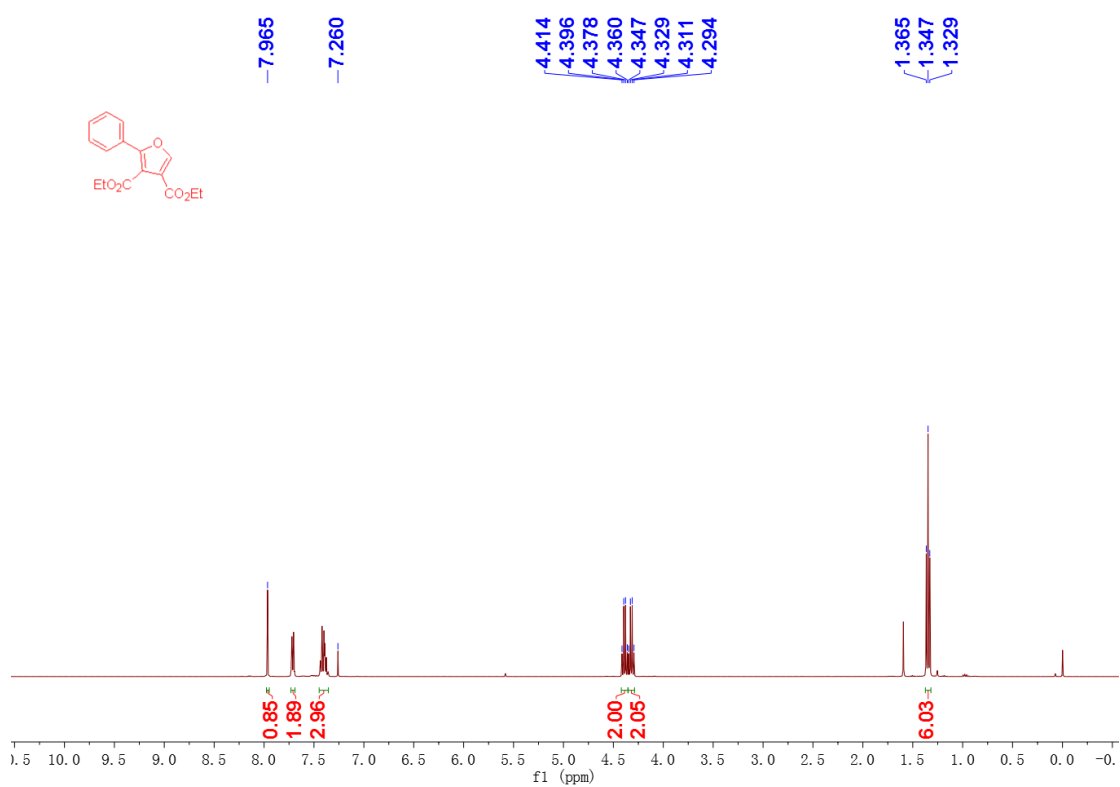

<sup>13</sup>C NMR (101 MHz, CDCl<sub>3</sub>)

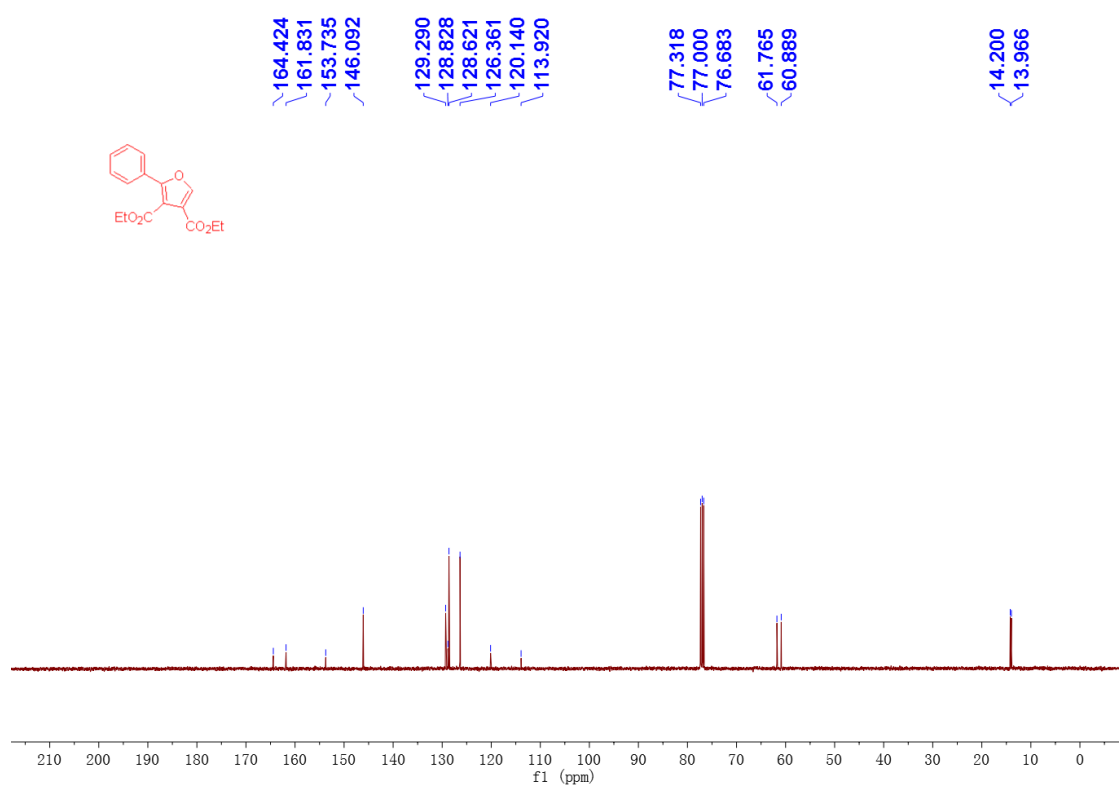

<sup>1</sup>H NMR (400 MHz, CDCl<sub>3</sub>) of compound **3bb**

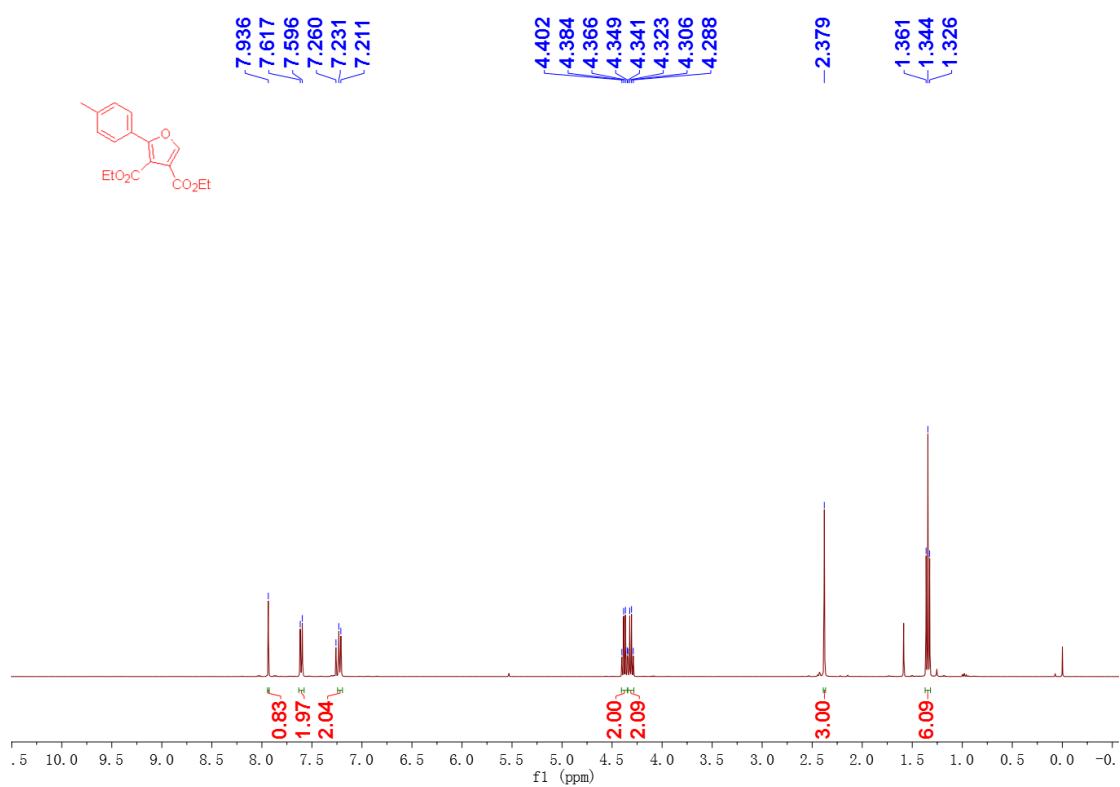

<sup>13</sup>C NMR (101 MHz, CDCl<sub>3</sub>)

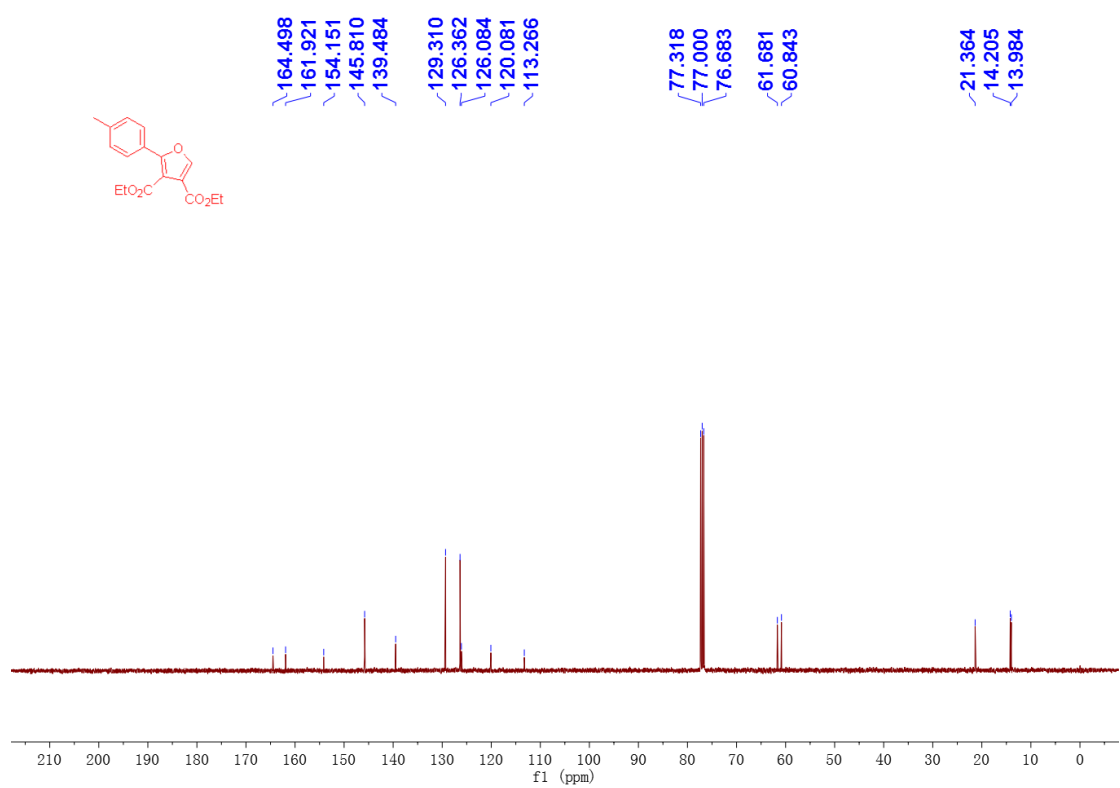

<sup>1</sup>H NMR (400 MHz, CDCl<sub>3</sub>) of compound **3bf**

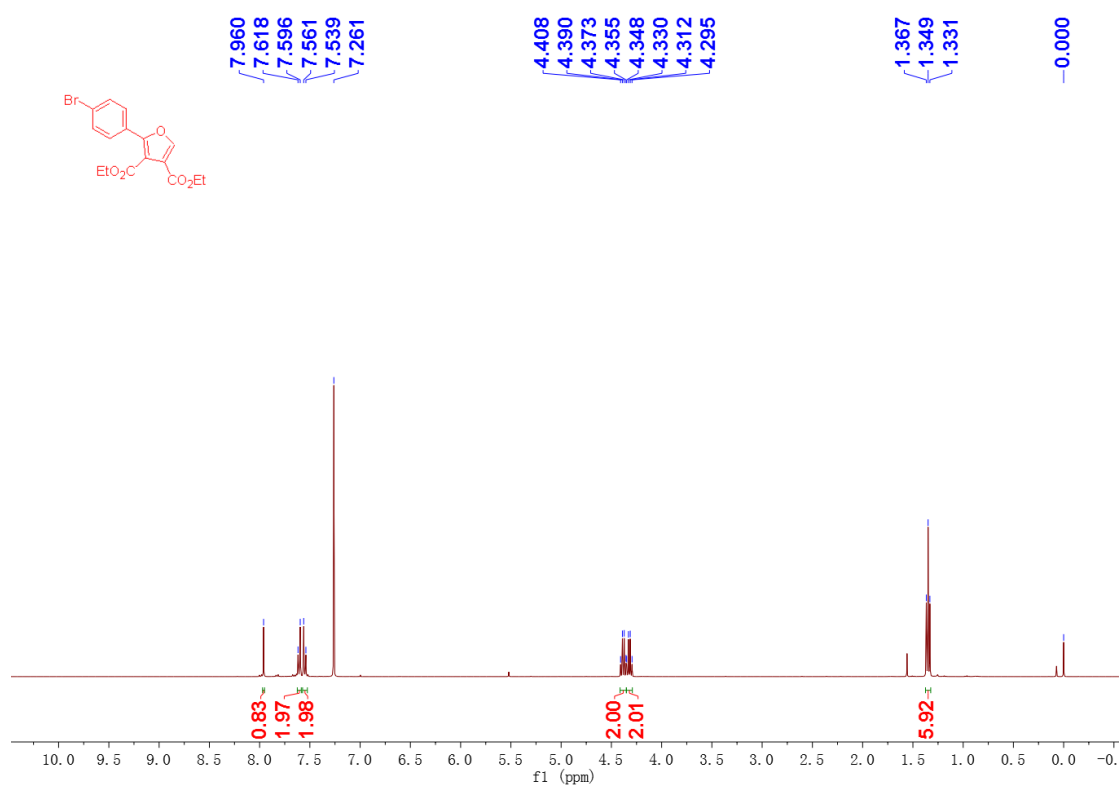

<sup>13</sup>C NMR (101 MHz, CDCl<sub>3</sub>)

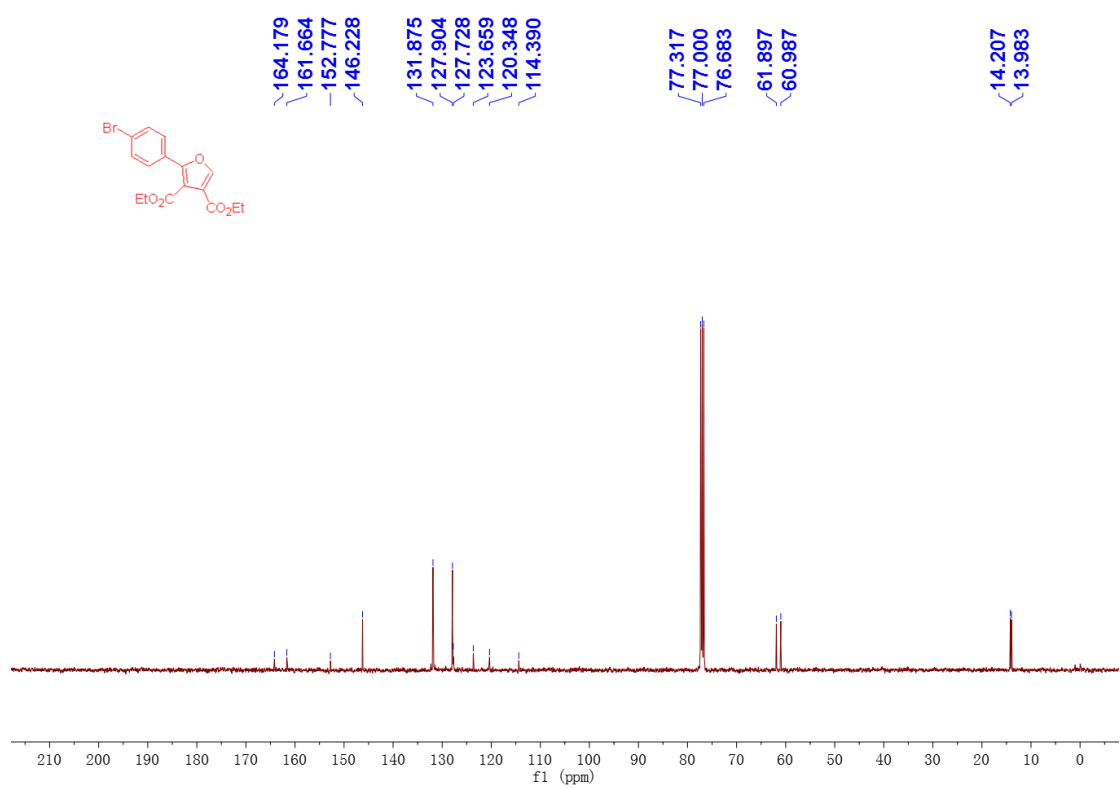

<sup>1</sup>H NMR (400 MHz, CDCl<sub>3</sub>) of compound **3ca**

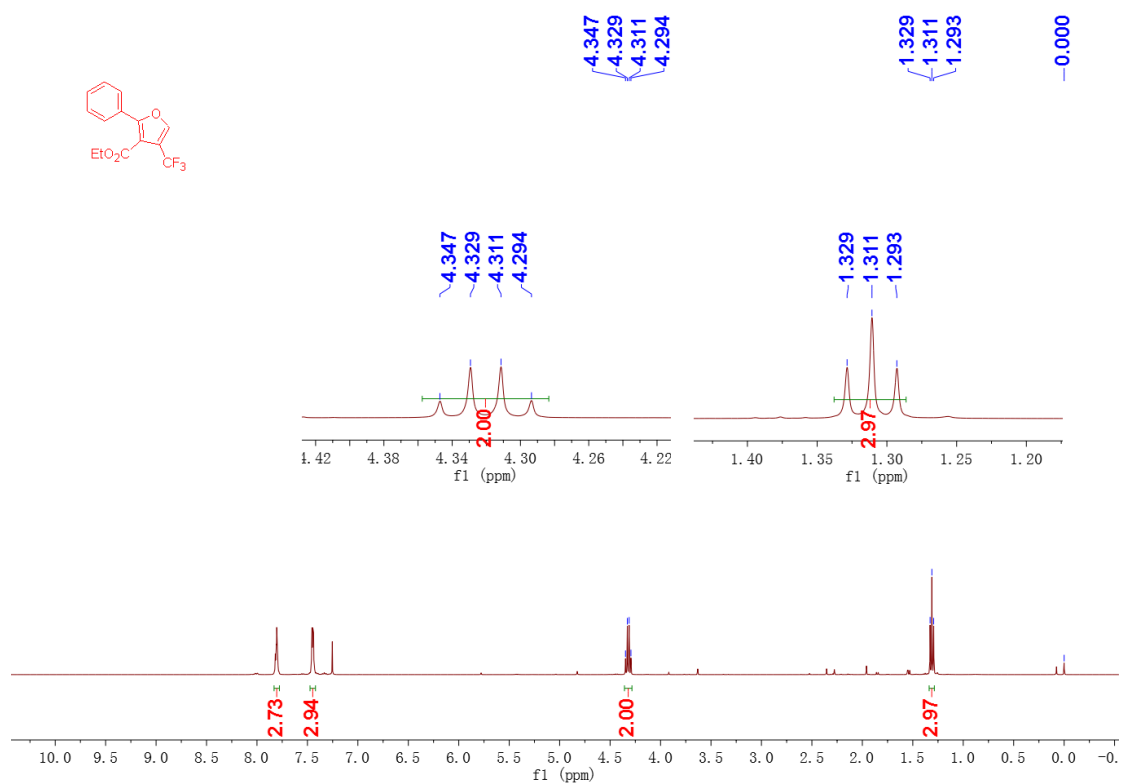

<sup>13</sup>C NMR (101 MHz, CDCl<sub>3</sub>)

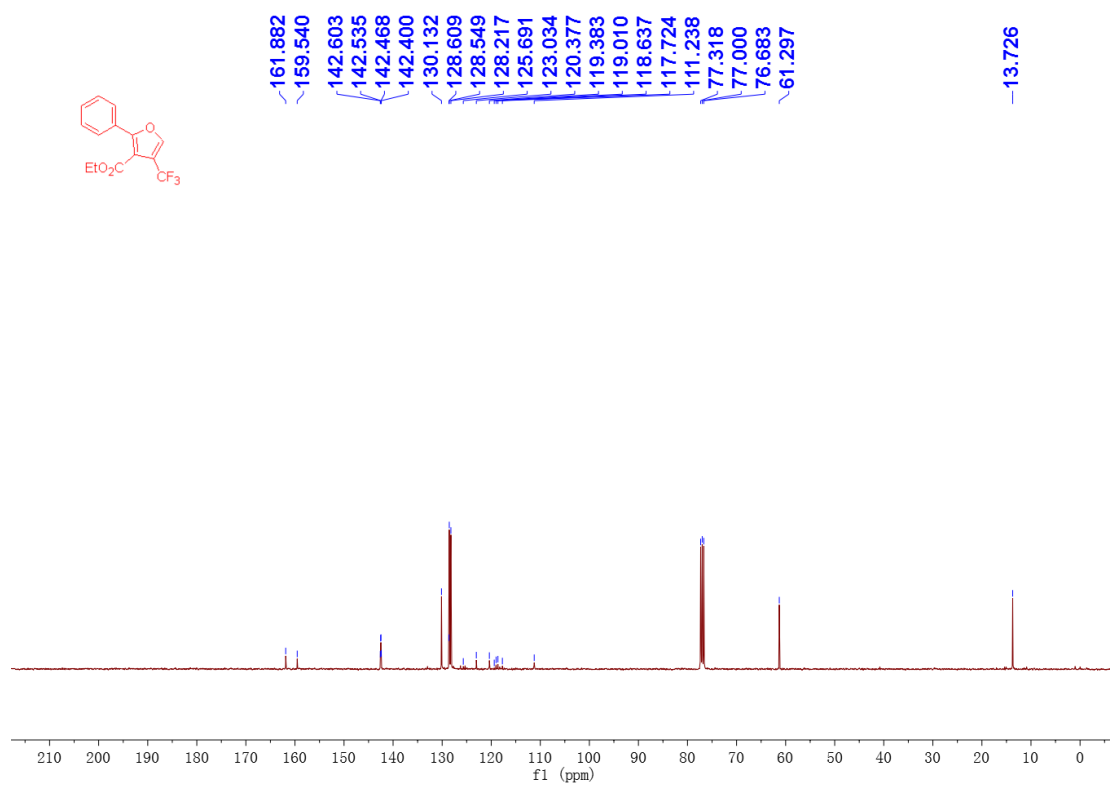

$^{19}\text{F}$  NMR (376 MHz,  $\text{CDCl}_3$ )

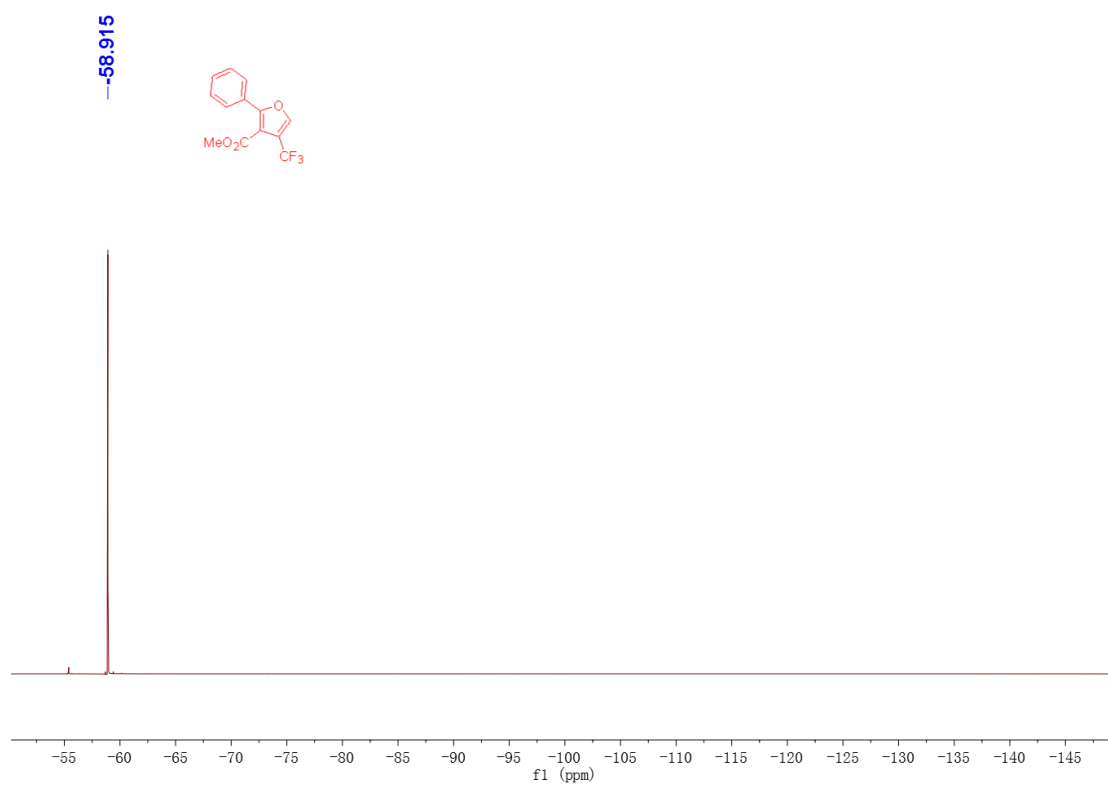

$^1\text{H}$  NMR (400 MHz,  $\text{CDCl}_3$ ) of compound **3cb**

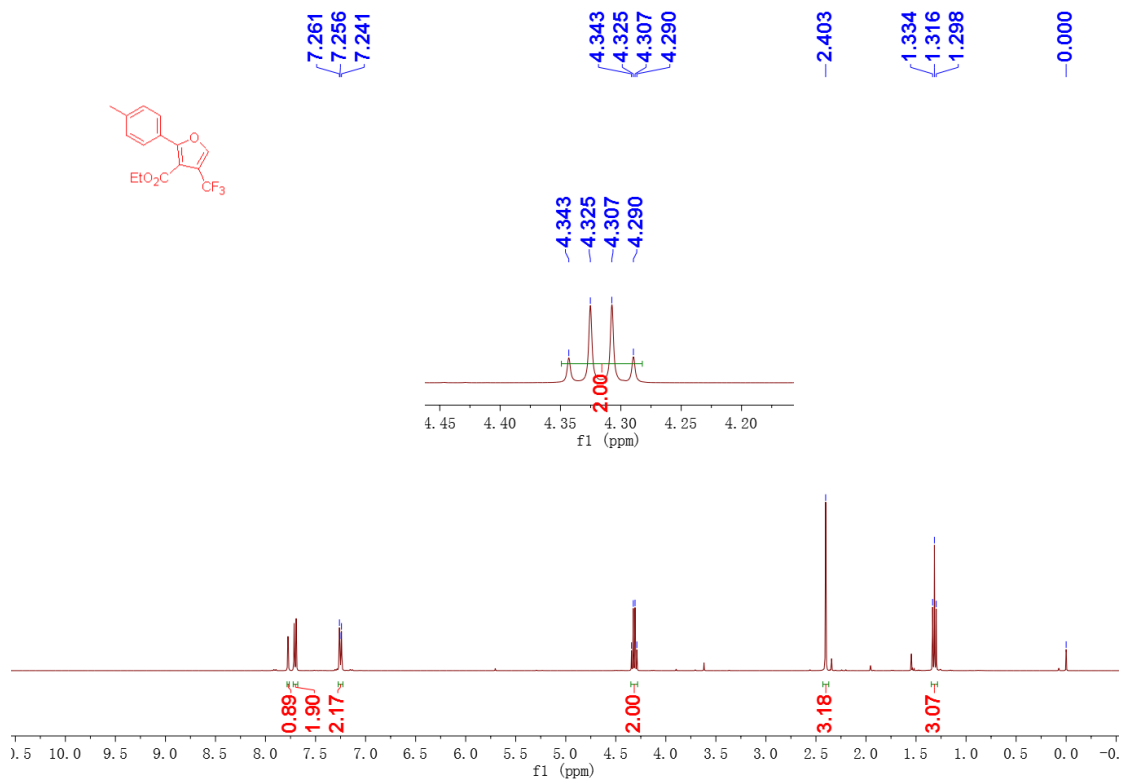

<sup>13</sup>C NMR (101 MHz, CDCl<sub>3</sub>)

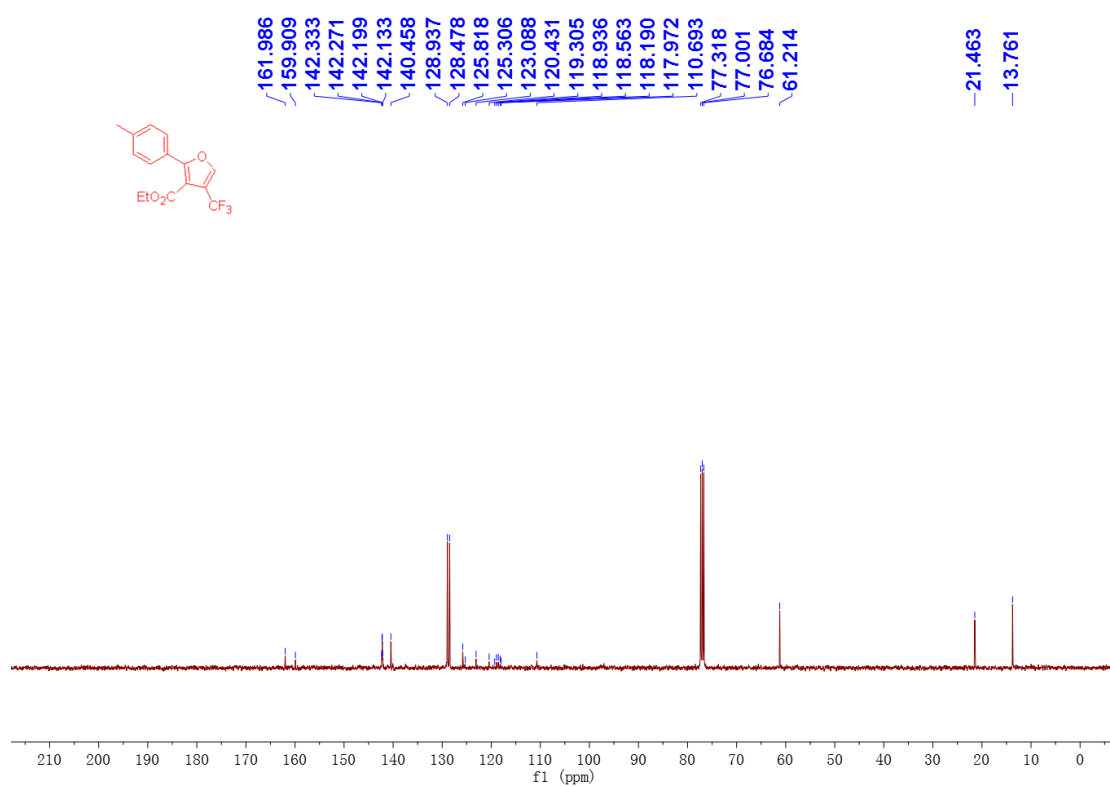

<sup>19</sup>F NMR (376 MHz, CDCl<sub>3</sub>)

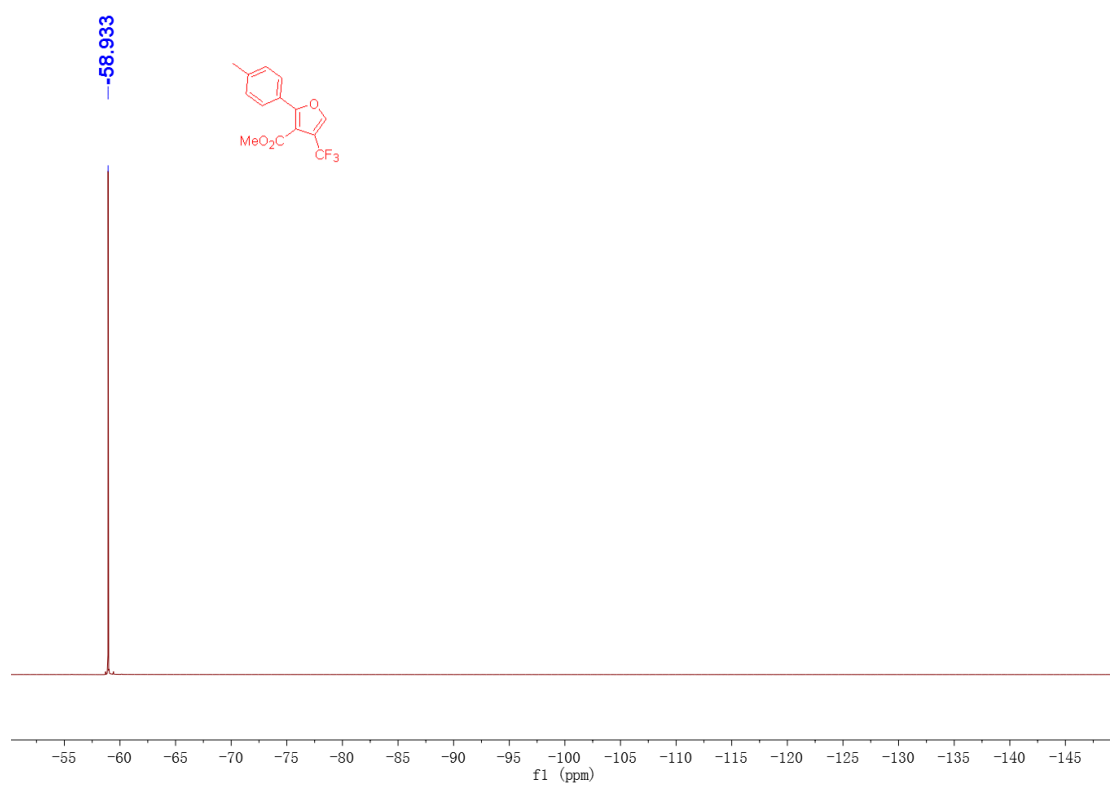

<sup>1</sup>H NMR (400 MHz, CDCl<sub>3</sub>) of compound **3cf**

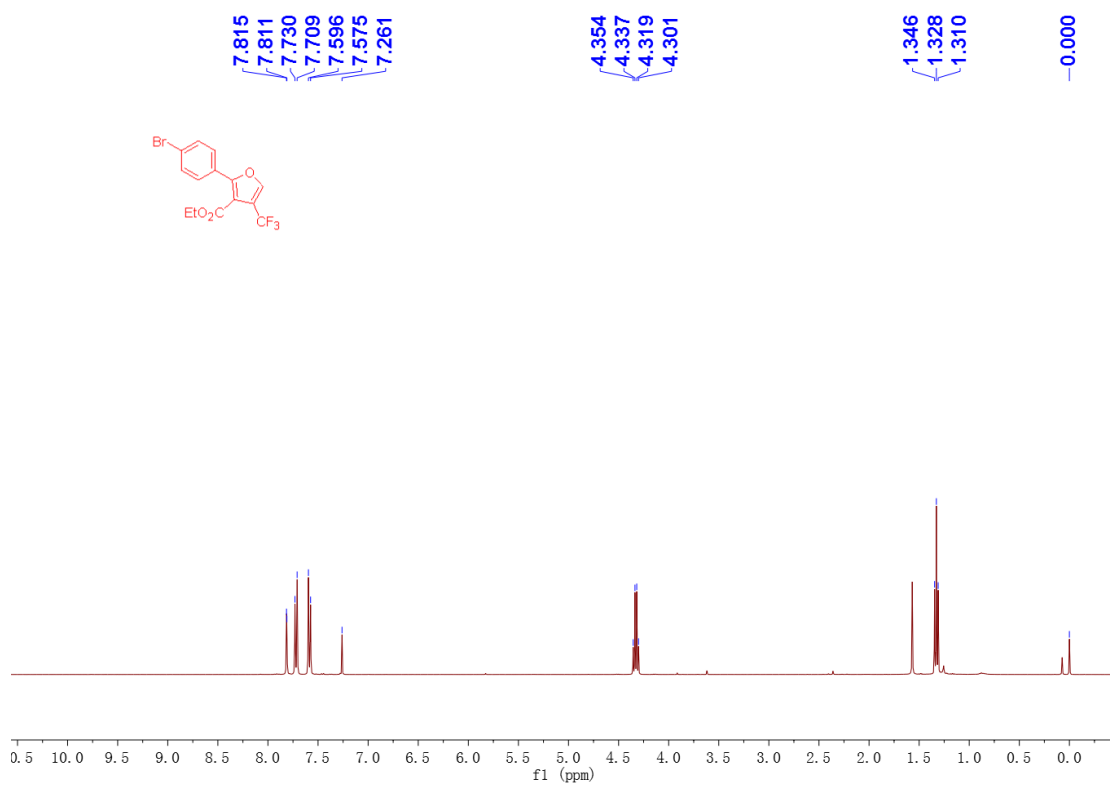

<sup>13</sup>C NMR (101 MHz, CDCl<sub>3</sub>)

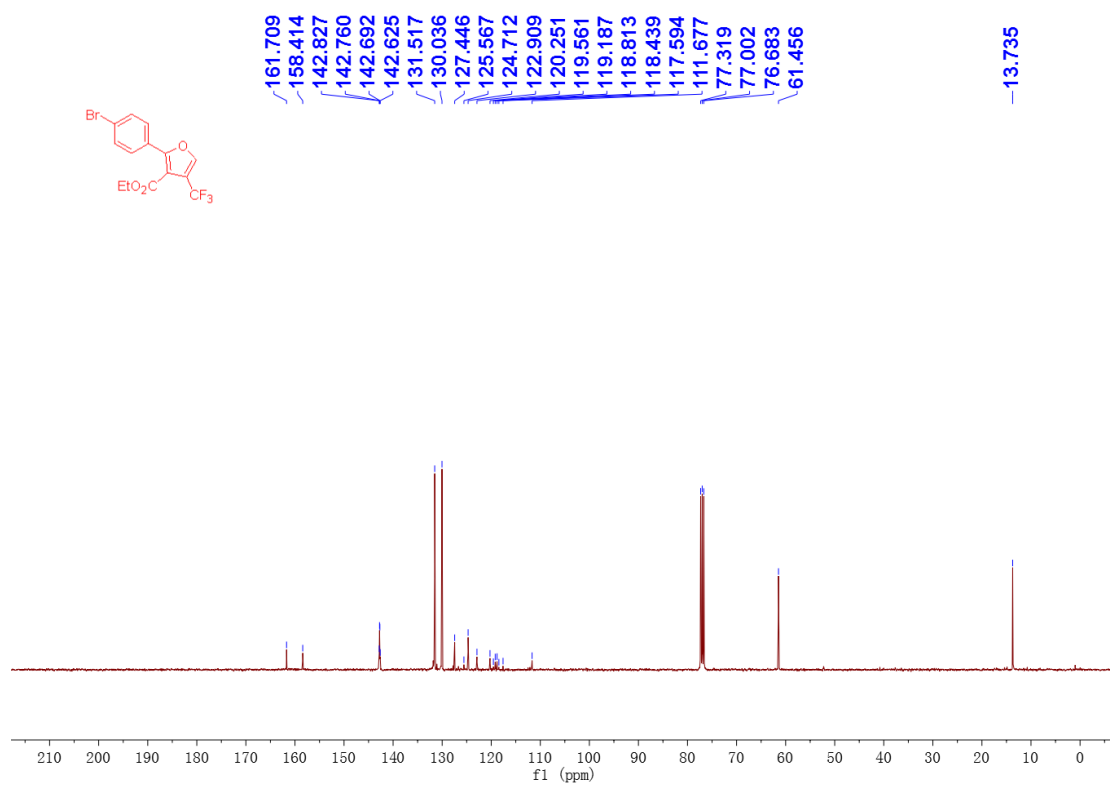



$^{19}\text{F}$  NMR (376 MHz,  $\text{CDCl}_3$ )

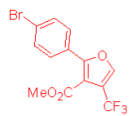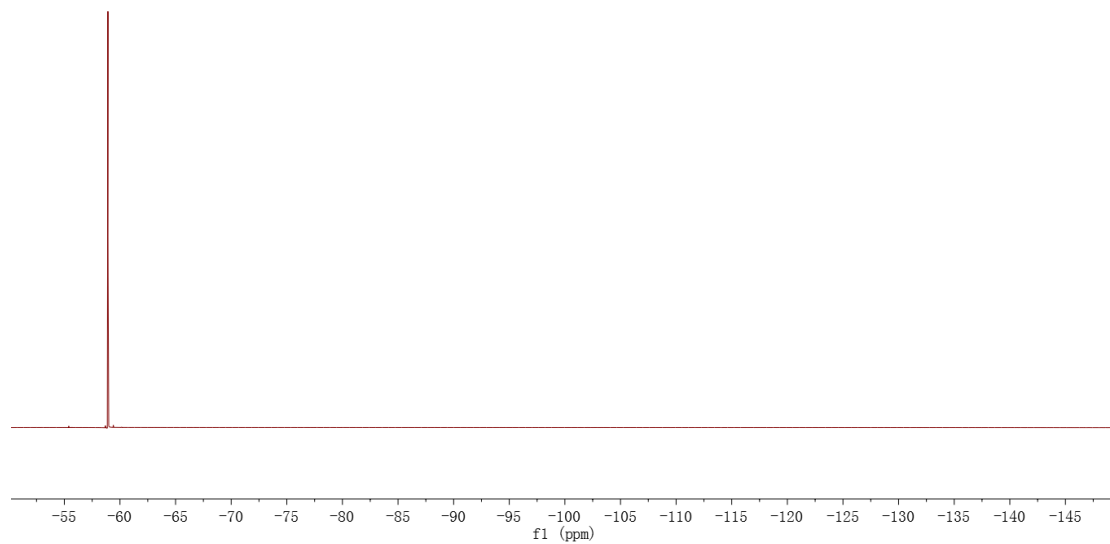

$^1\text{H}$  NMR (400 MHz,  $\text{CDCl}_3$ ) of compound **3da**

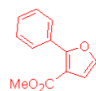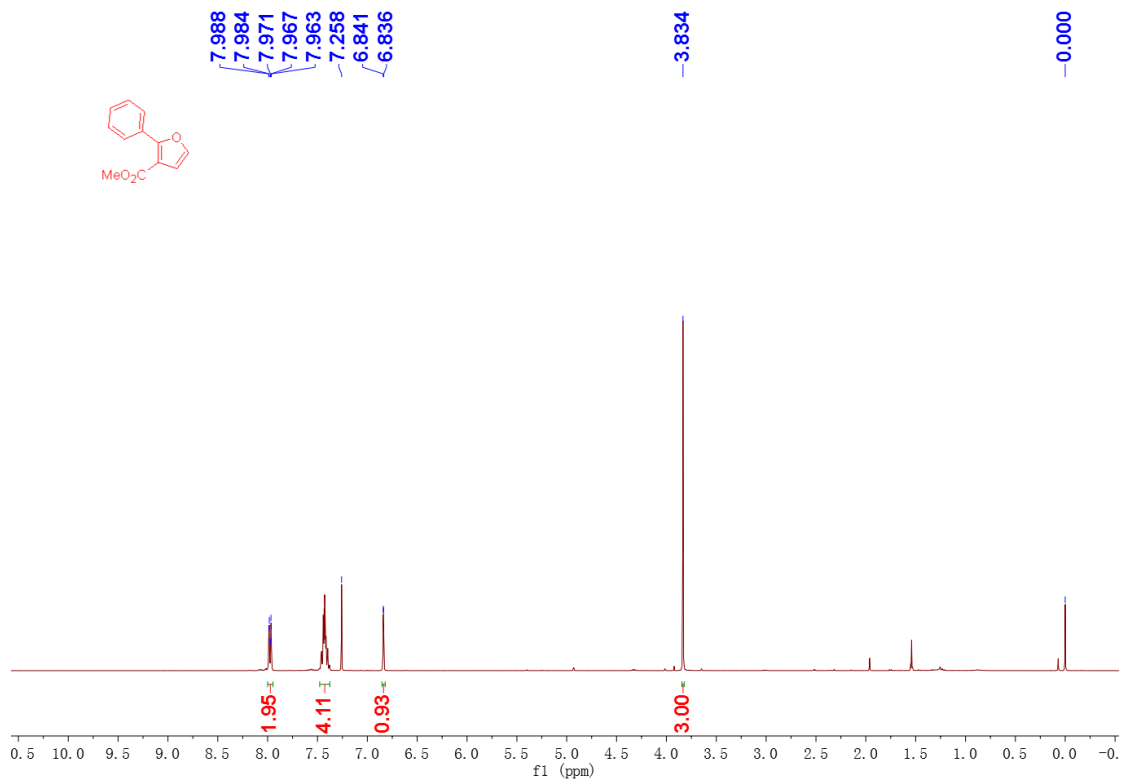

<sup>13</sup>C NMR (101 MHz, CDCl<sub>3</sub>)

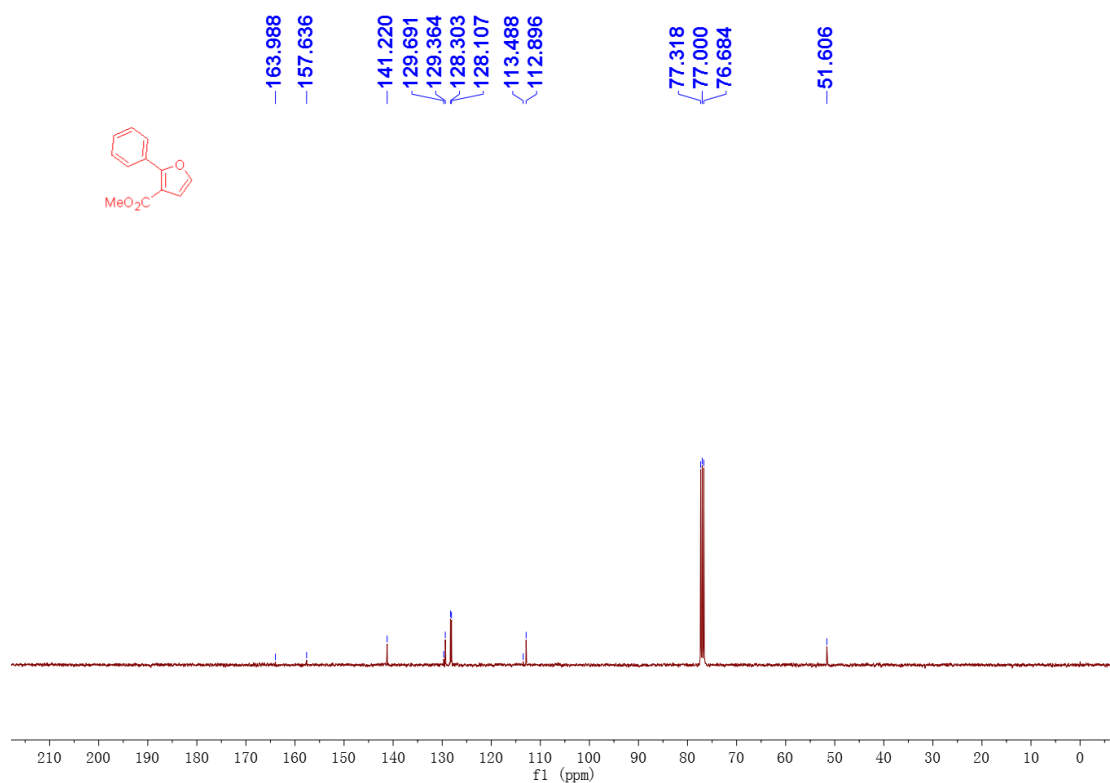

<sup>1</sup>H NMR (400 MHz, CDCl<sub>3</sub>) of compound **3am**

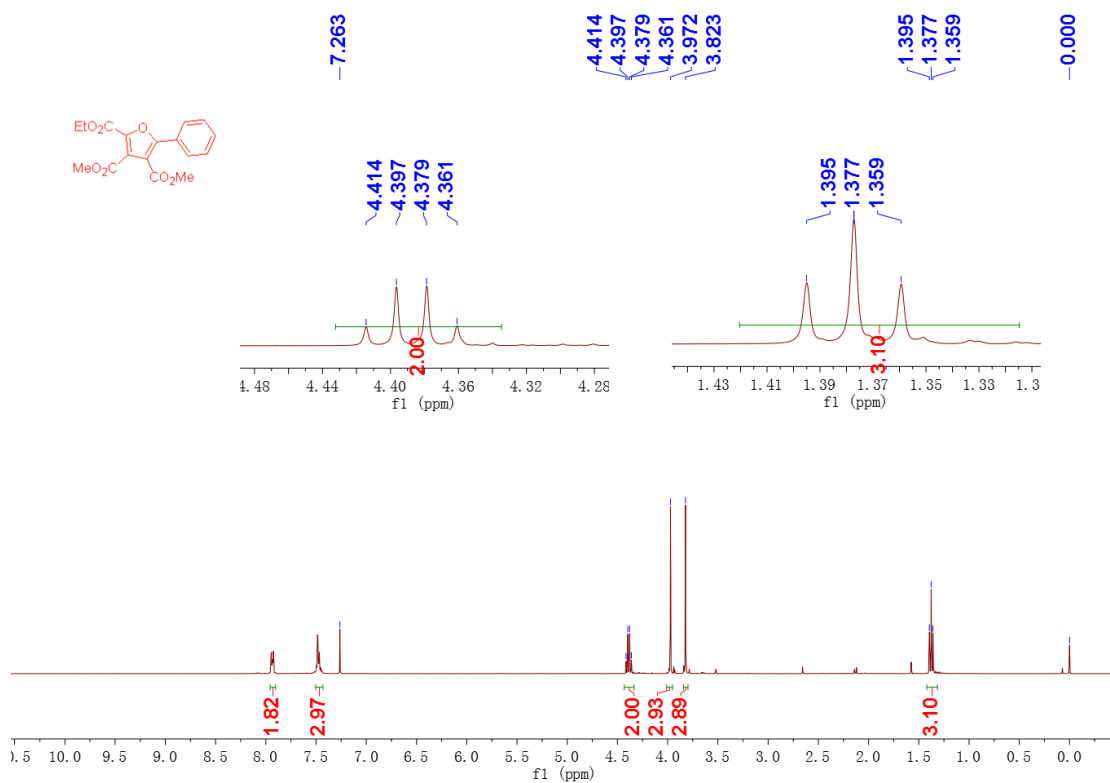

<sup>13</sup>C NMR (101 MHz, CDCl<sub>3</sub>)

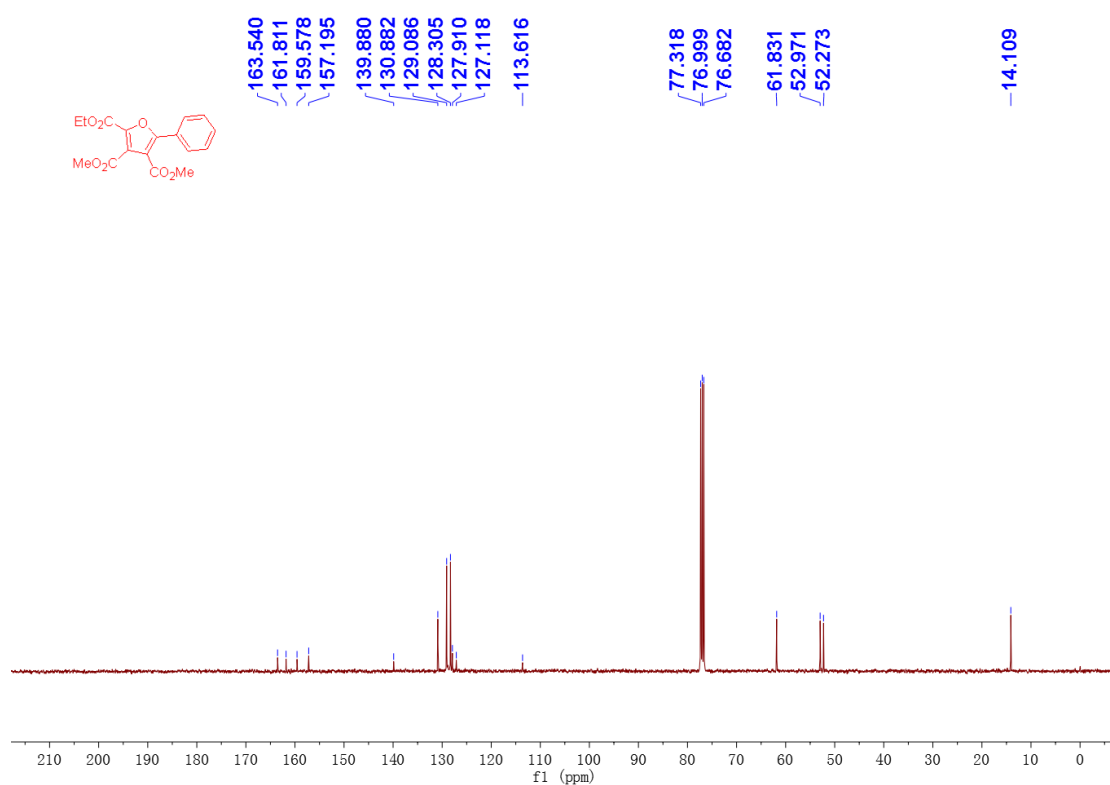

<sup>1</sup>H NMR (400 MHz, CDCl<sub>3</sub>) of compound 3bm

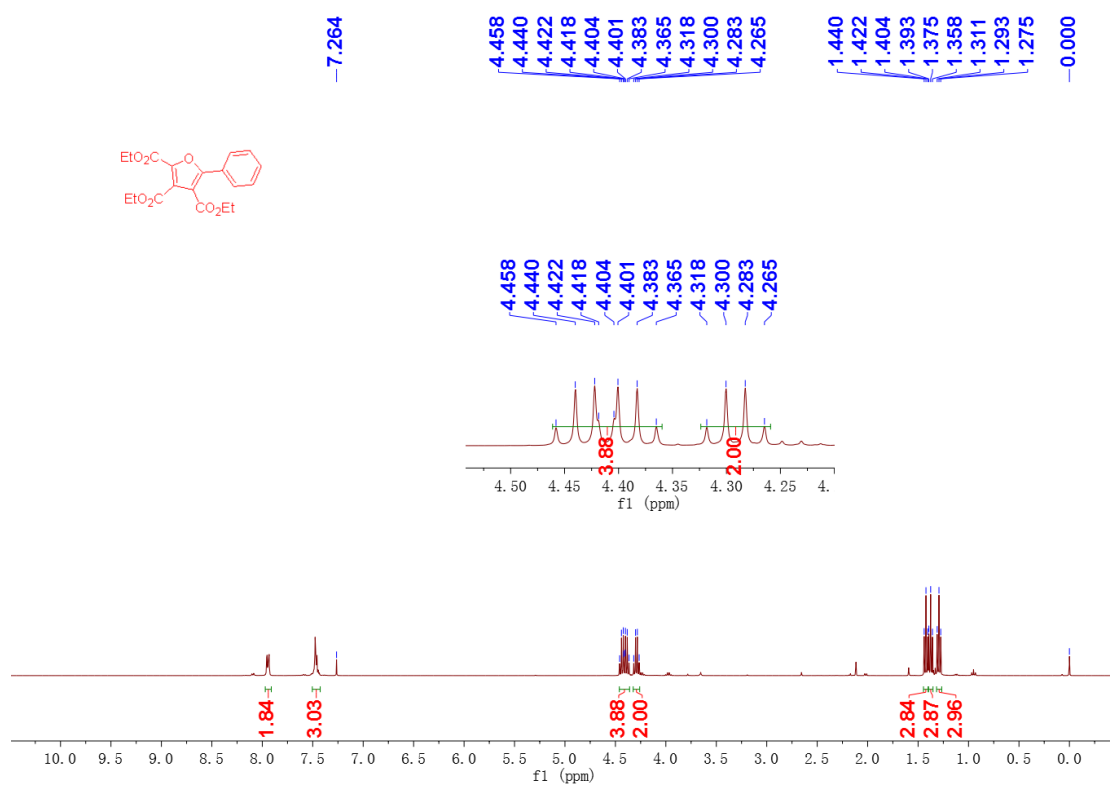

<sup>13</sup>C NMR (101 MHz, CDCl<sub>3</sub>)

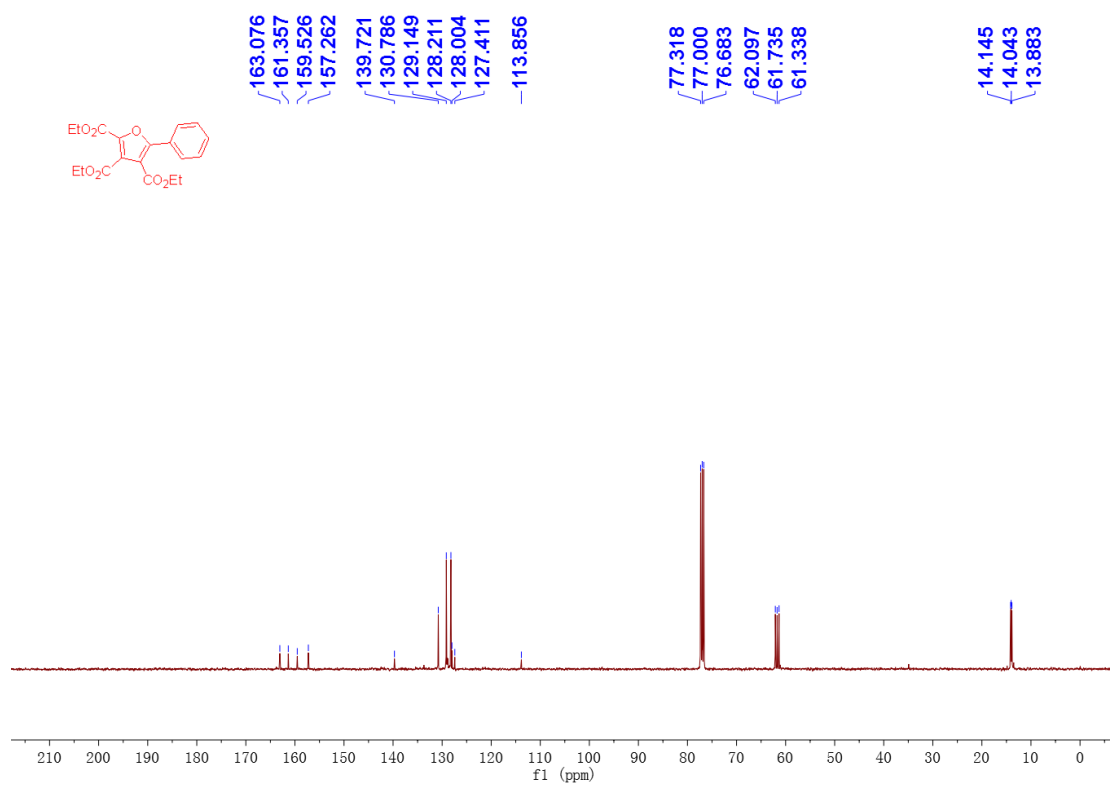

<sup>1</sup>H NMR (400 MHz, CDCl<sub>3</sub>) of compound 3an

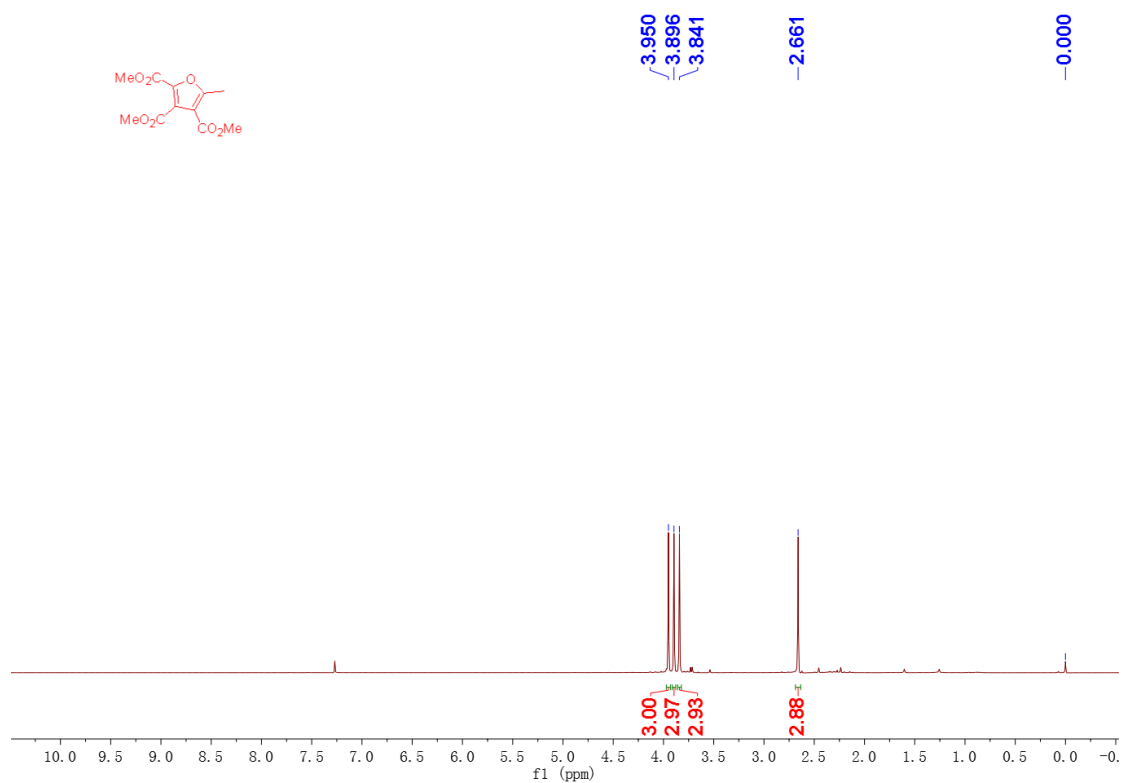

<sup>13</sup>C NMR (101 MHz, CDCl<sub>3</sub>)

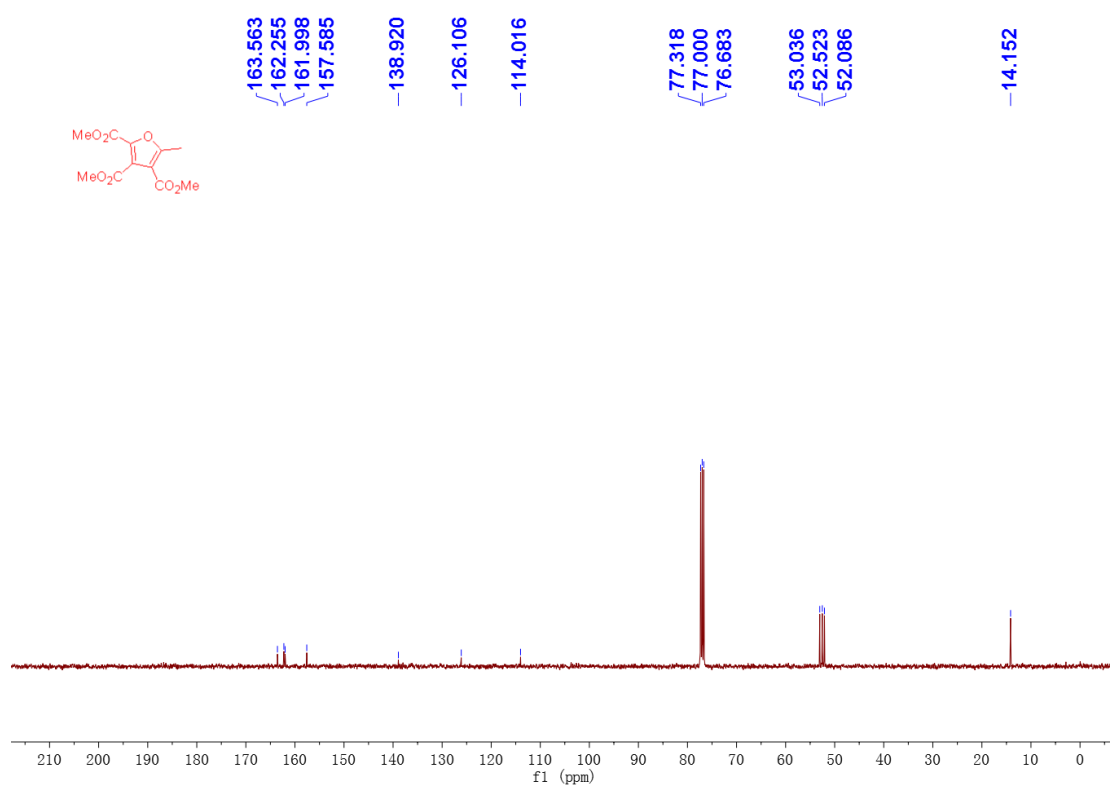

<sup>1</sup>H NMR (400 MHz, CDCl<sub>3</sub>) of compound **3bn**

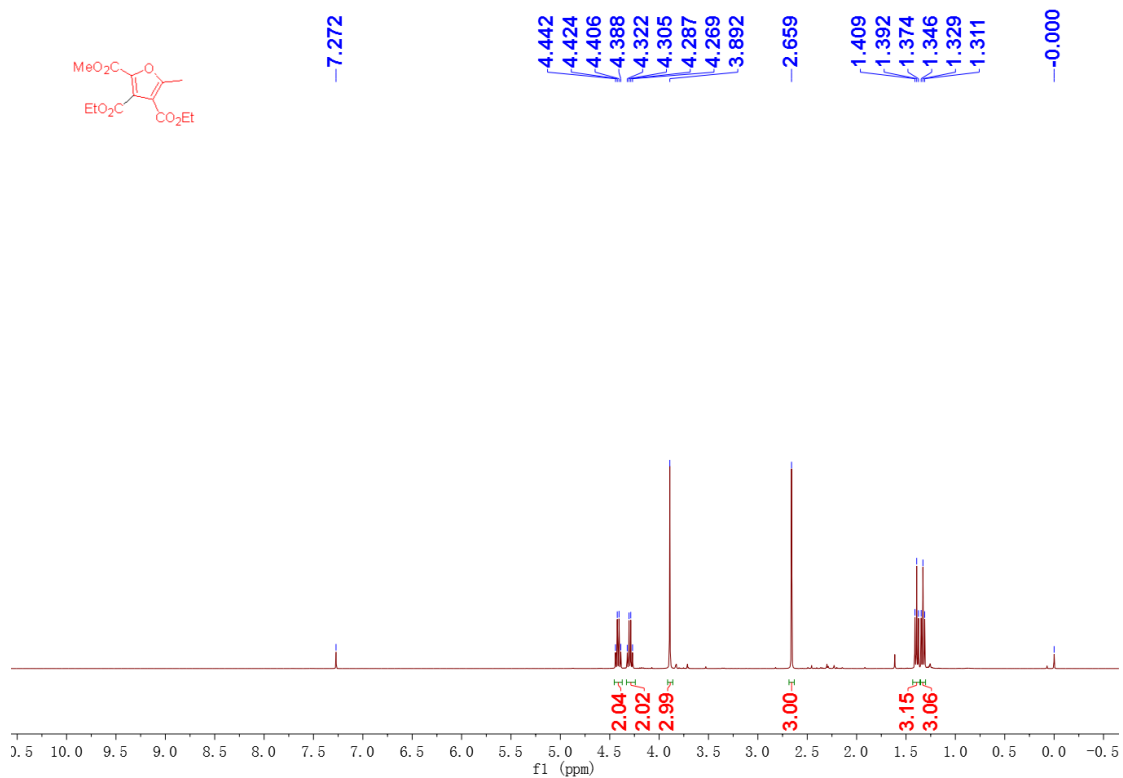

<sup>13</sup>C NMR (101 MHz, CDCl<sub>3</sub>)

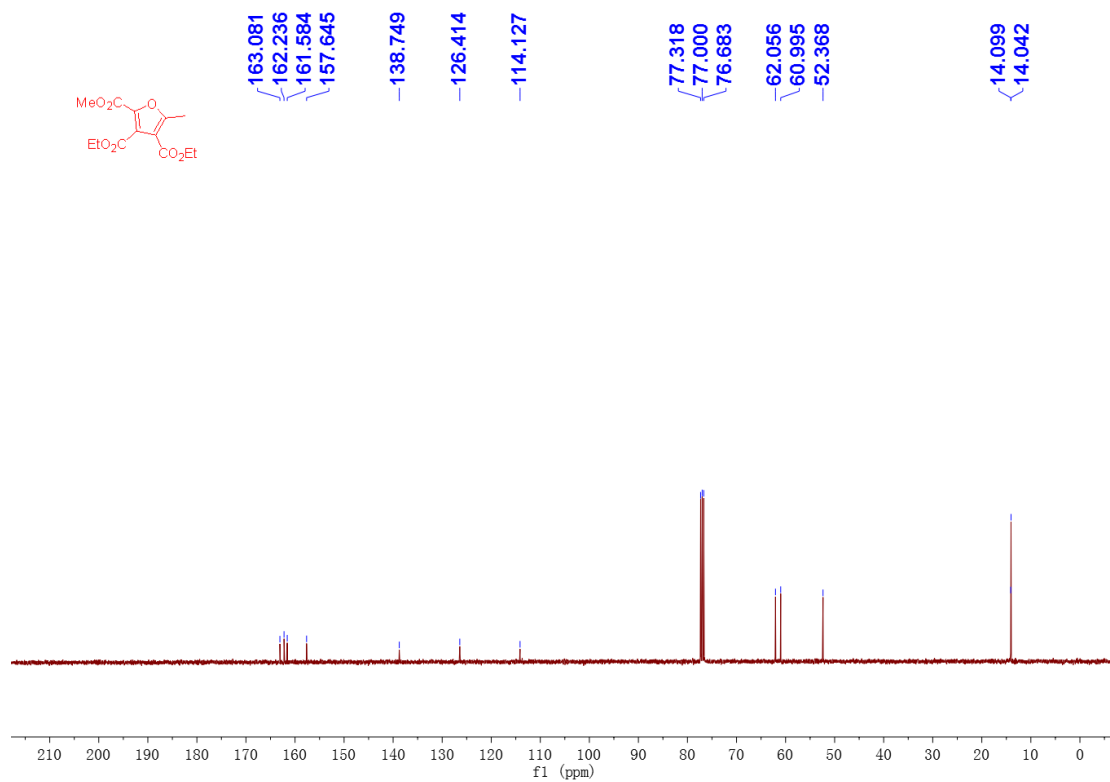

<sup>1</sup>H NMR (400 MHz, CDCl<sub>3</sub>) of compound 3dm

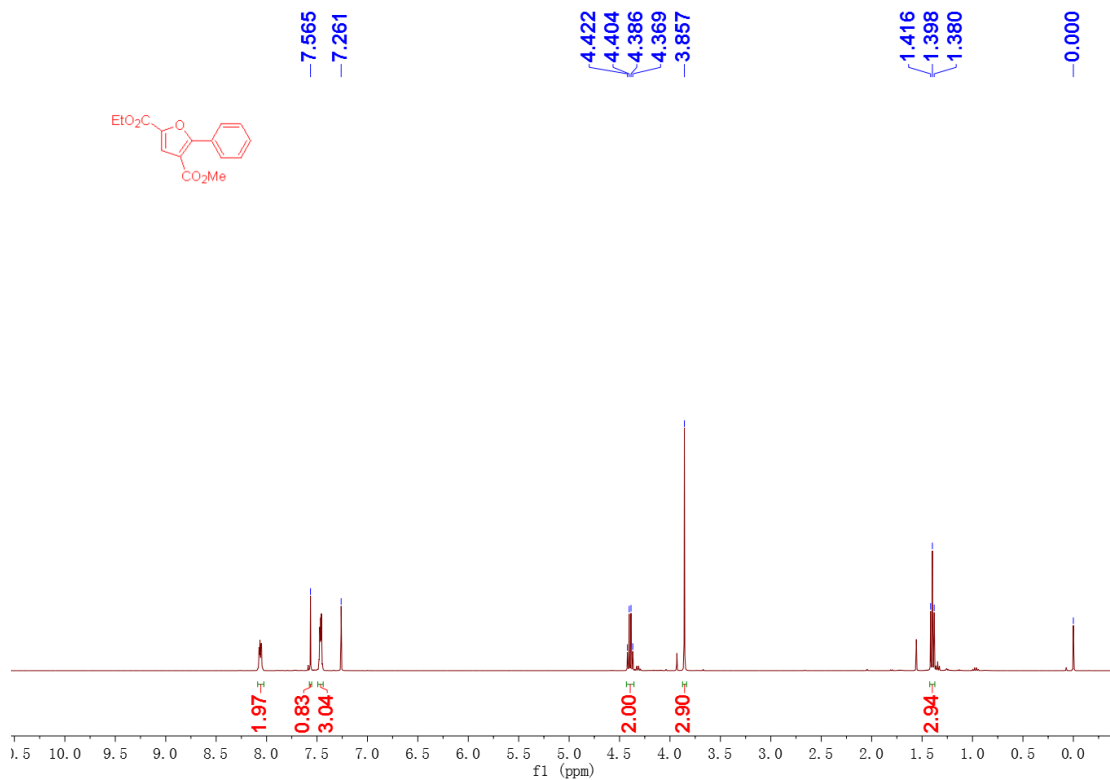

<sup>13</sup>C NMR (101 MHz, CDCl<sub>3</sub>)

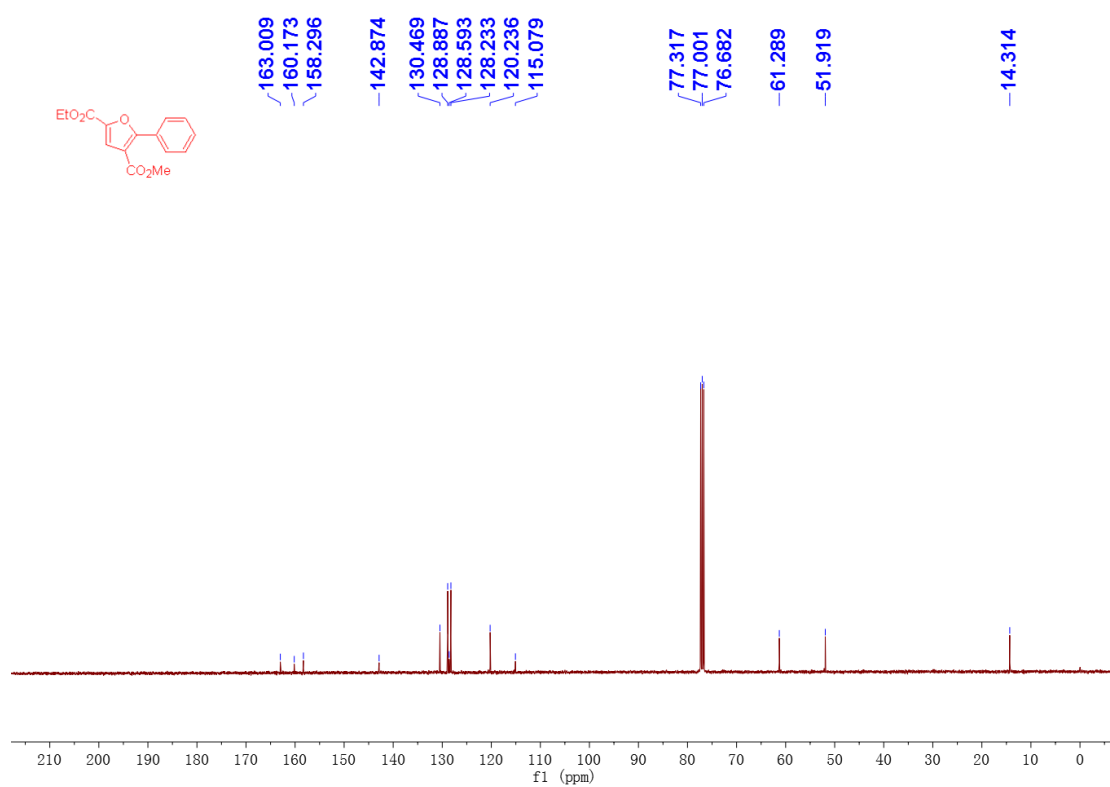

<sup>1</sup>H NMR (400 MHz, CDCl<sub>3</sub>) of compound 3en

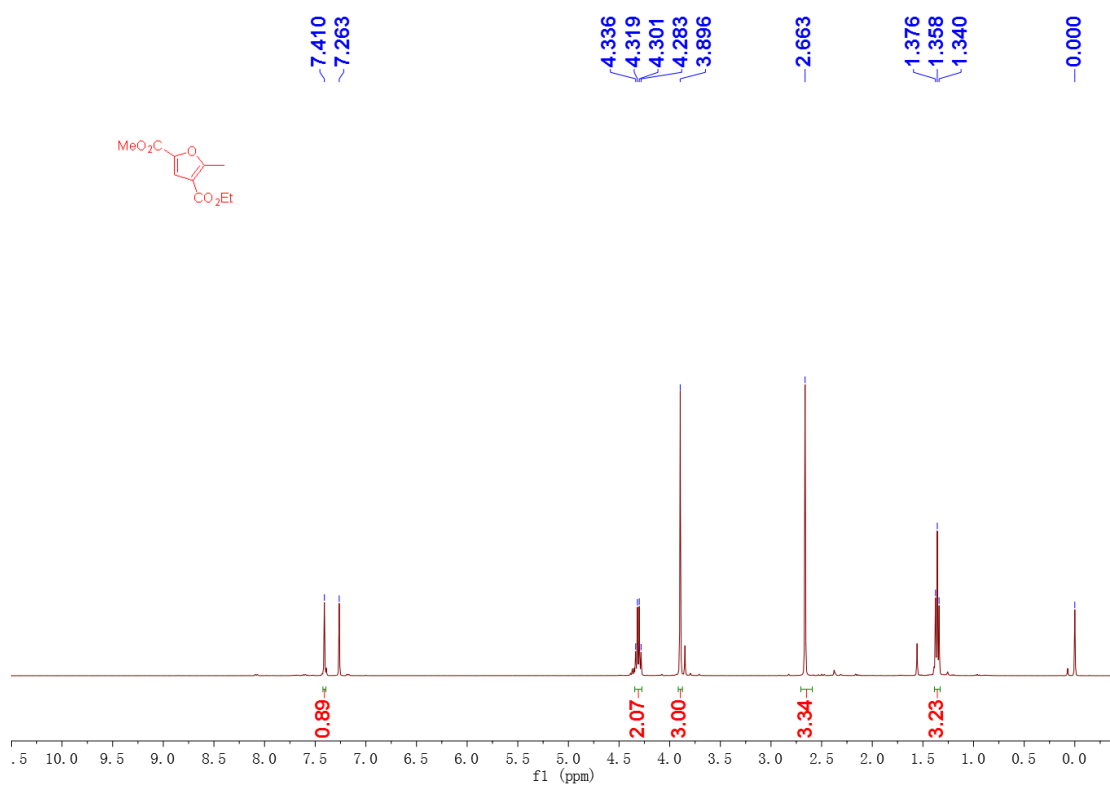

<sup>13</sup>C NMR (101 MHz, CDCl<sub>3</sub>)

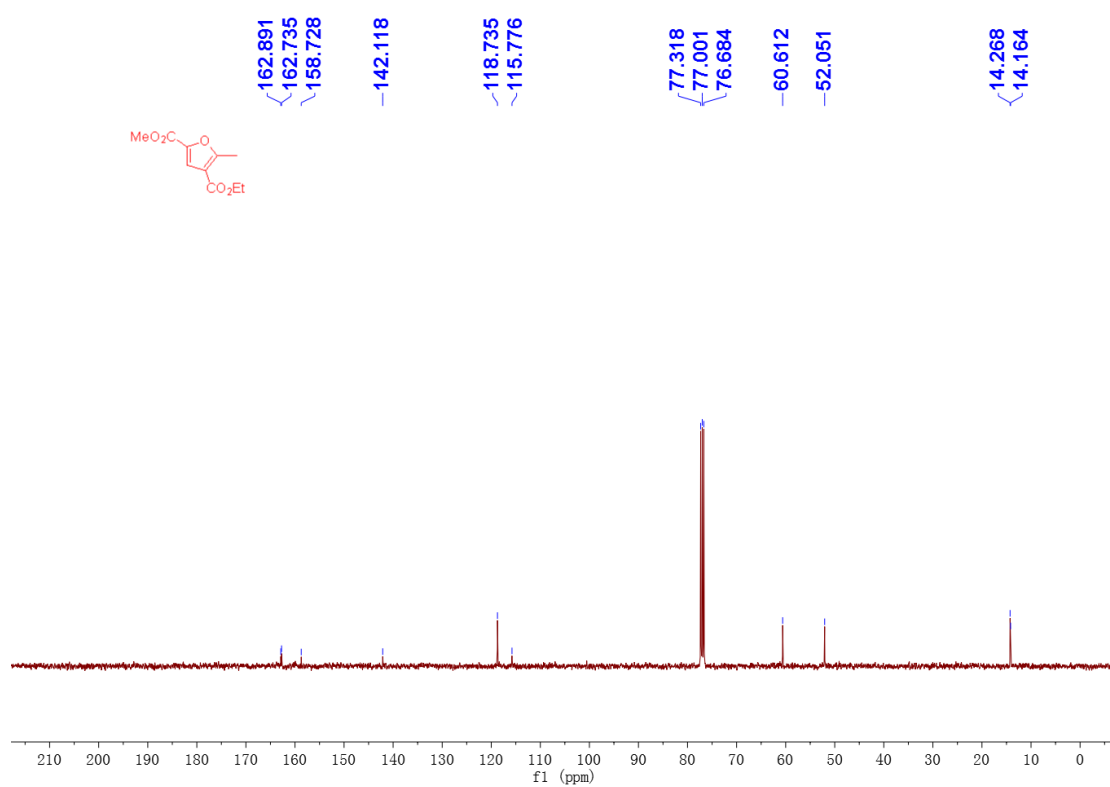

<sup>1</sup>H NMR (400 MHz, CDCl<sub>3</sub>) of compound 3en and 4en

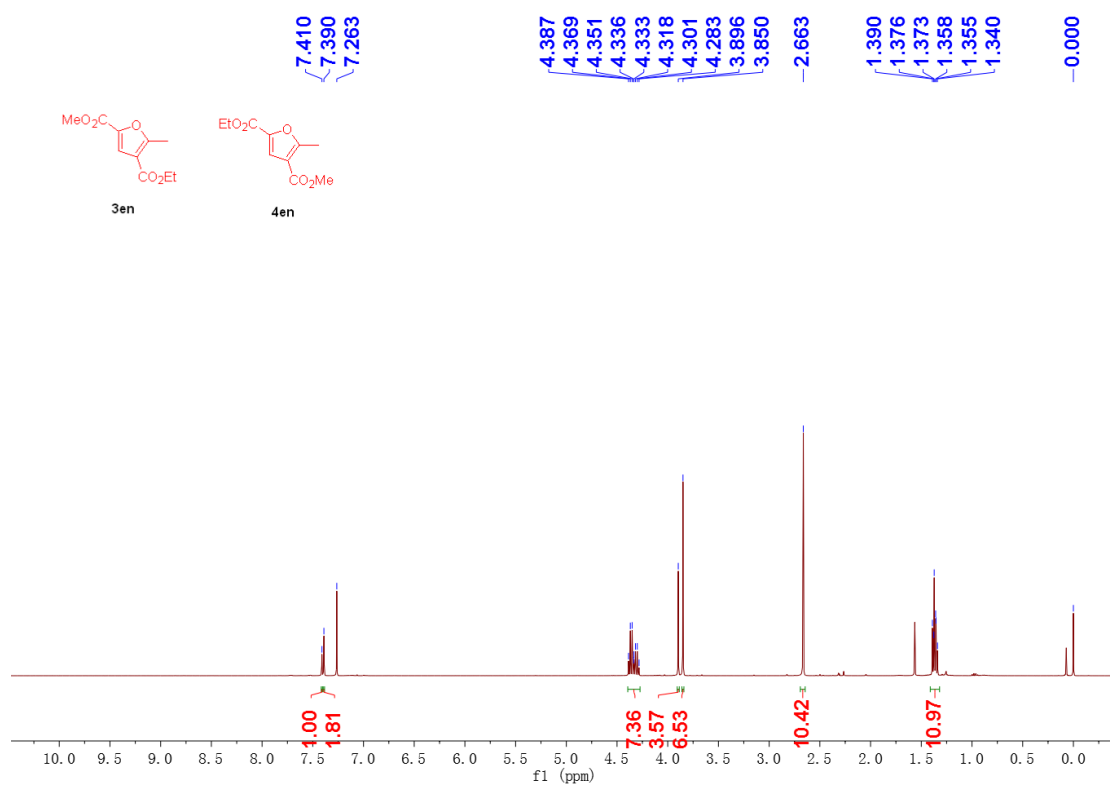



### Copies of HR-MS spectra of unknown furan products 3

#### Copy of HR-MS spectra of **3ad**

HR-MS (ESI)  $m/z$   $[M+H]^+$  calcd for  $C_{14}H_{12}FO_5^+$ : 279.0663, found: 279.0667.

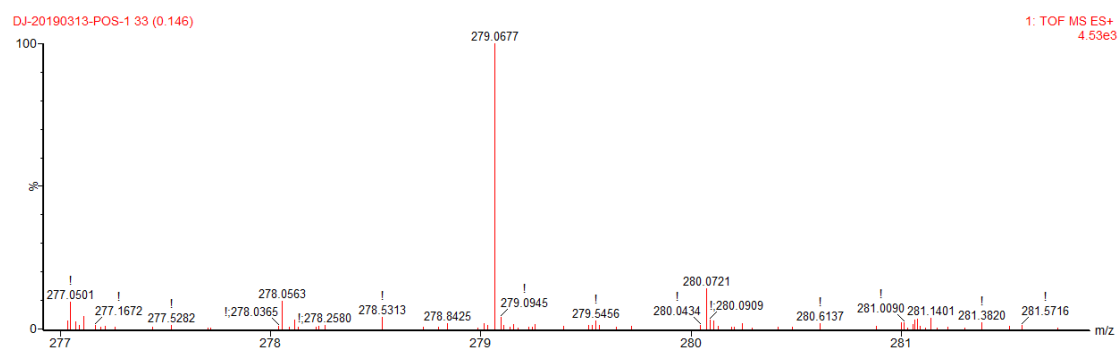

#### Copy of HR-MS spectra of **3ag**

HR-MS (ESI)  $m/z$   $[M+H]^+$  calcd for  $C_{15}H_{12}F_3O_5^+$ : 329.0631, found: 329.0634.

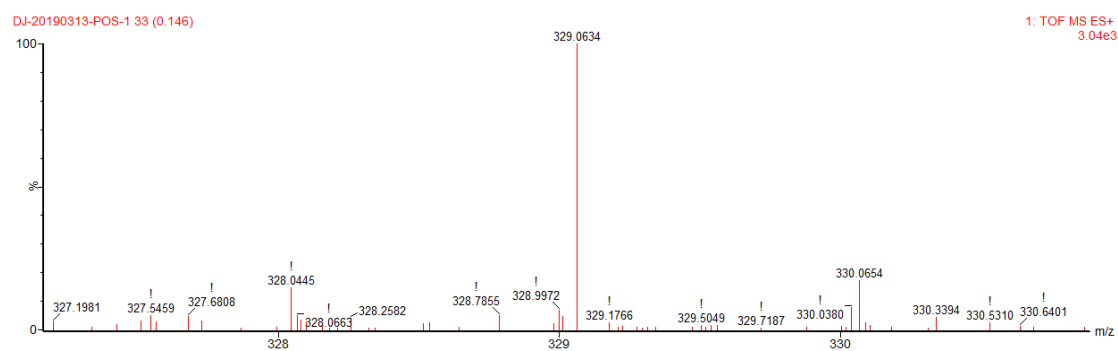

#### Copy of HR-MS spectra of **3ah**

HR-MS (ESI)  $m/z$   $[M+H]^+$  calcd for  $C_{15}H_{12}NO_5^+$ : 286.0710, found: 286.0707.

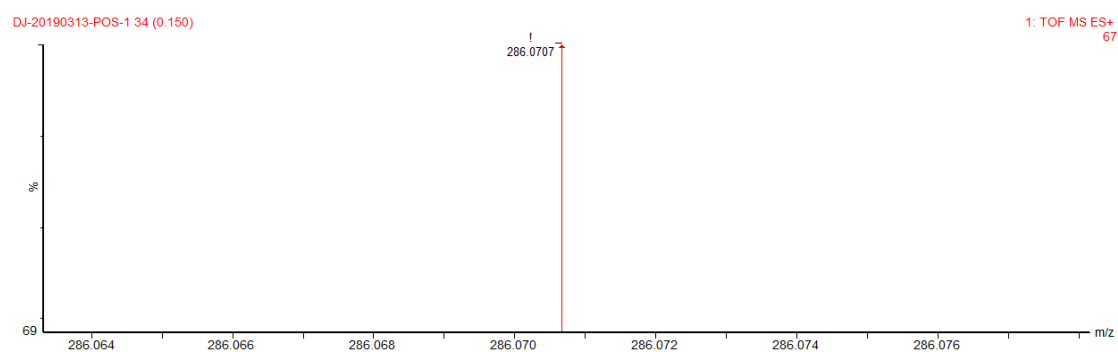

Copy of HR-MS spectra of **3ai**

HR-MS (ESI)  $m/z$   $[M+H]^+$  calcd for  $C_{14}H_{12}NO_7^+$ : 306.0608, found: 306.0616.

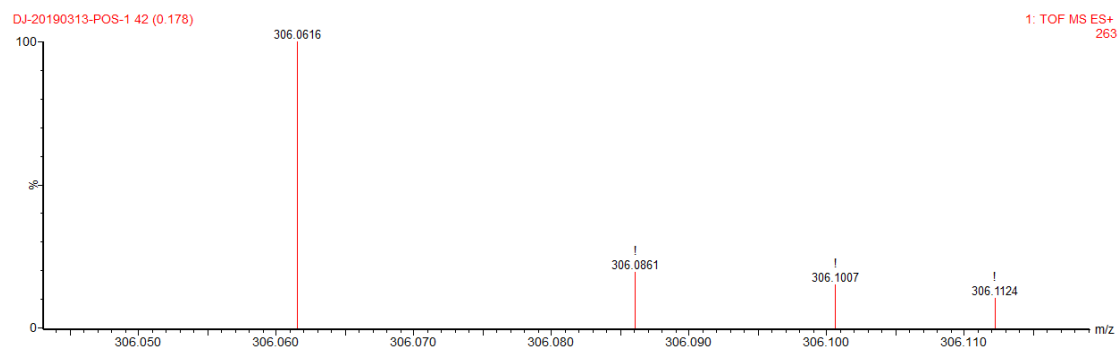

Copy of HR-MS spectra of **3aj**

HR-MS (ESI)  $m/z$   $[M+H]^+$  calcd for  $C_{14}H_{11}Cl_2O_5^+$ : 328.9978, found: 328.9978.

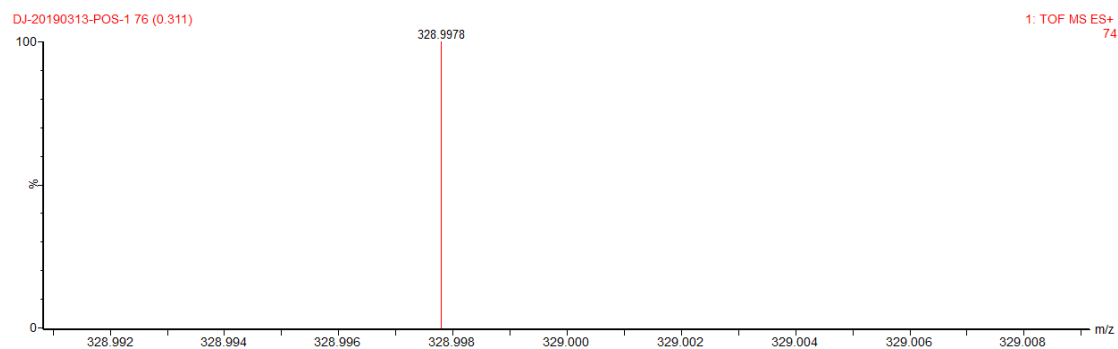

Copy of HR-MS spectra of **3ak**

HR-MS (ESI)  $m/z$   $[M+H]^+$  calcd for  $C_{18}H_{15}O_5^+$ : 311.0914, found: 311.0914.

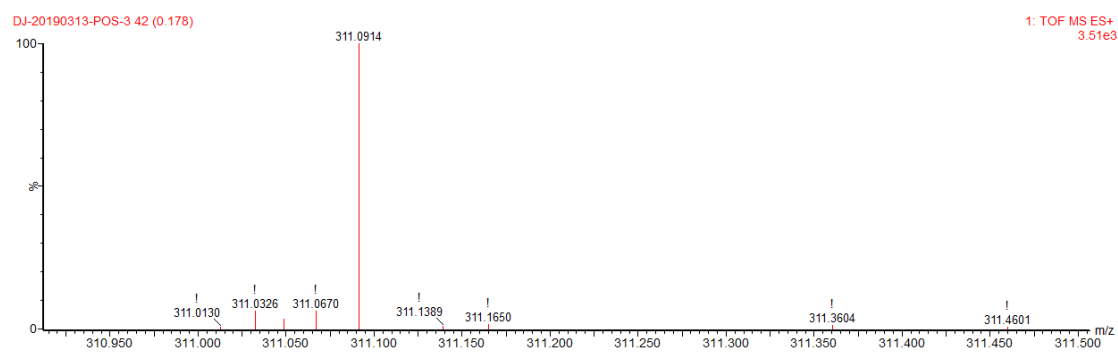

Copy of HR-MS spectra of **3a**

HR-MS (ESI)  $m/z$   $[M+H]^+$  calcd for  $C_{18}H_{15}O_5^+$ : 311.0914, found: 311.0915.

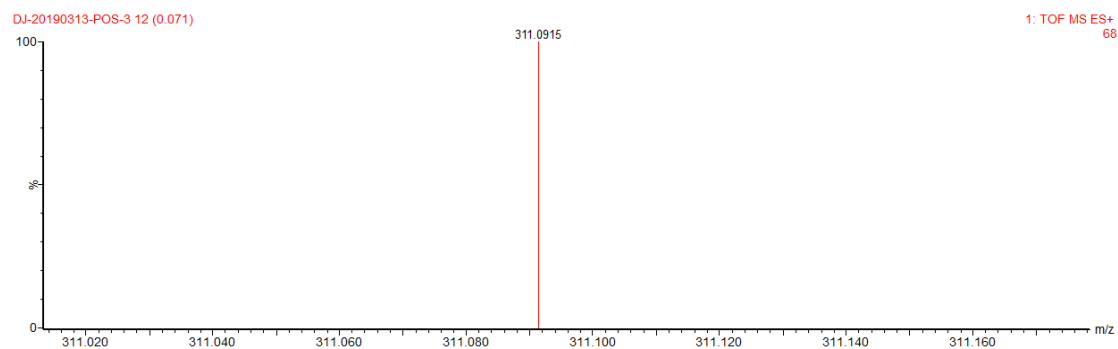

Copy of HR-MS spectra of **3ba**

HR-MS (ESI)  $m/z$   $[M+H]^+$  calcd for  $C_{16}H_{17}O_5^+$ : 289.1071, found: 289.1072.

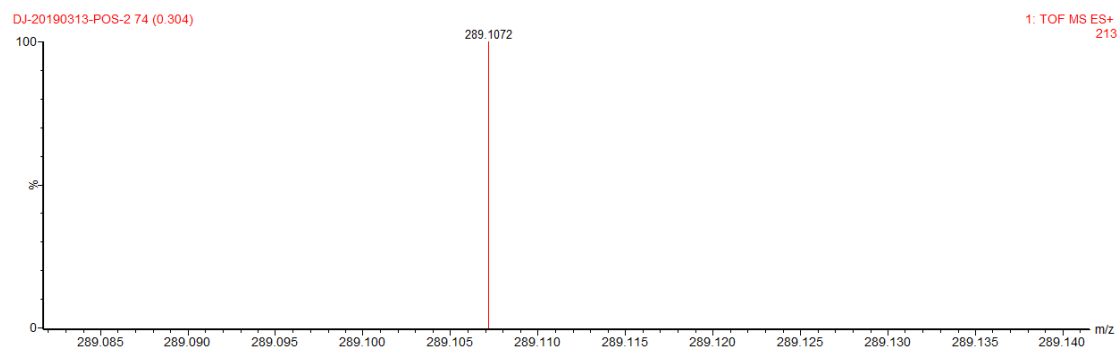

Copy of HR-MS spectra of **3bb**

HR-MS (ESI)  $m/z$   $[M+H]^+$  calcd for  $C_{17}H_{19}O_5^+$ : 303.1227, found: 303.1227.

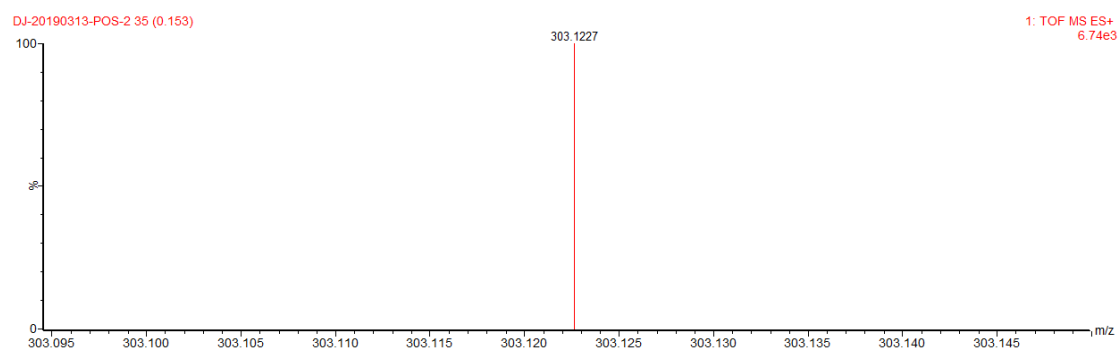

Copy of HR-MS spectra of **3bf**

HR-MS (ESI)  $m/z$   $[M+H]^+$  calcd for  $C_{16}H_{16}BrO_5^+$ : 367.0176, found: 367.0177.

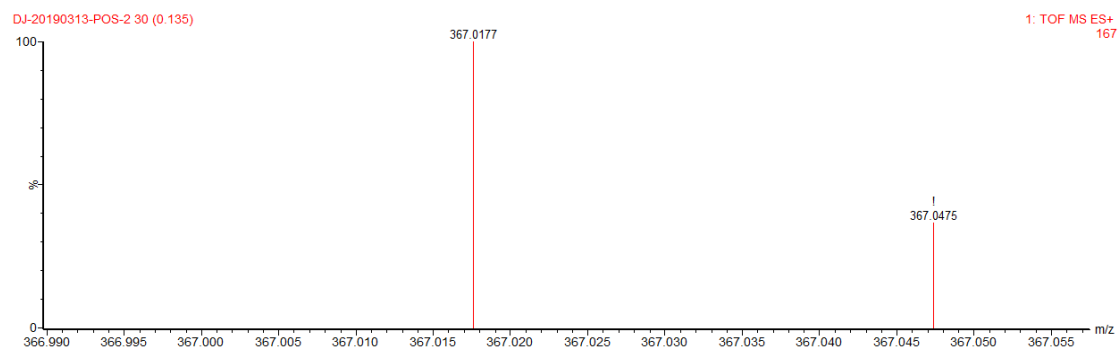

Copy of HR-MS spectra of **3ca**

HR-MS (ESI)  $m/z$   $[M+H]^+$  calcd for  $C_{14}H_{12}F_3O_3^+$ : 285.0733, found: 285.0725.

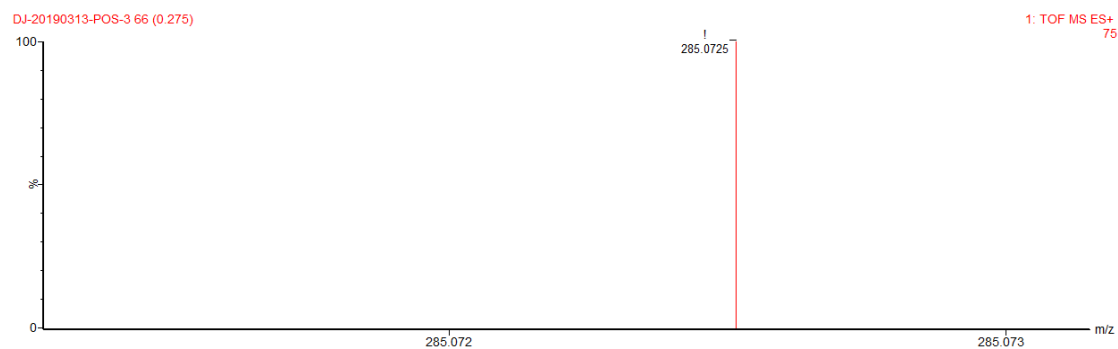

Copy of HR-MS spectra of **3cb**

HR-MS (ESI)  $m/z$   $[M+H]^+$  calcd for  $C_{15}H_{14}F_3O_3^+$ : 299.0890, found: 299.0889.

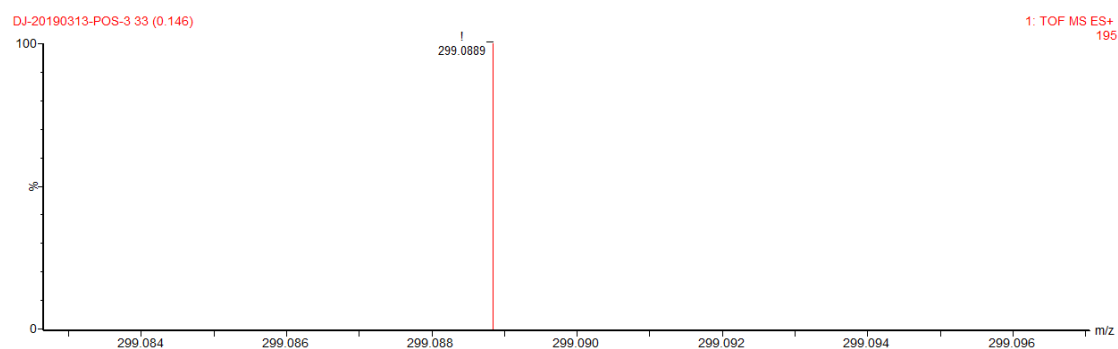

Copy of HR-MS spectra of **3cf**

HR-MS (ESI)  $m/z$   $[M+H]^+$  calcd for  $C_{14}H_{11}BrF_3O_3^+$ : 362.9838, found: 362.9832.

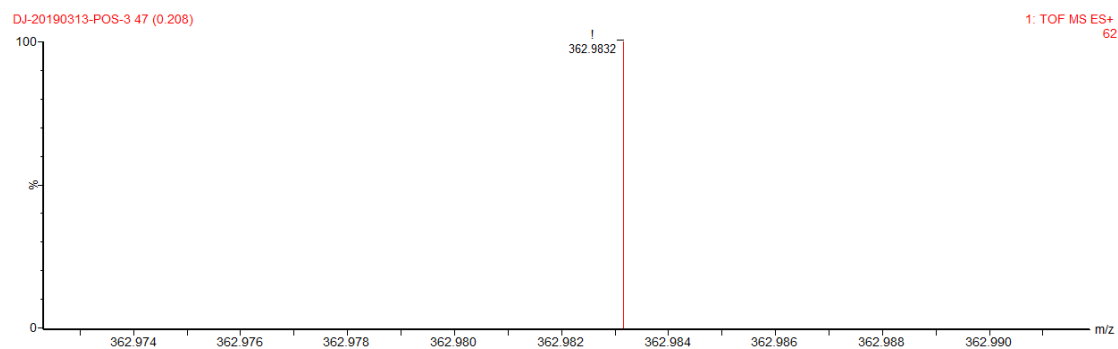

Copy of HR-MS spectra of **3am**

HR-MS (ESI)  $m/z$   $[M+H]^+$  calcd for  $C_{17}H_{17}O_7^+$ : 333.0969, found: 333.0963.

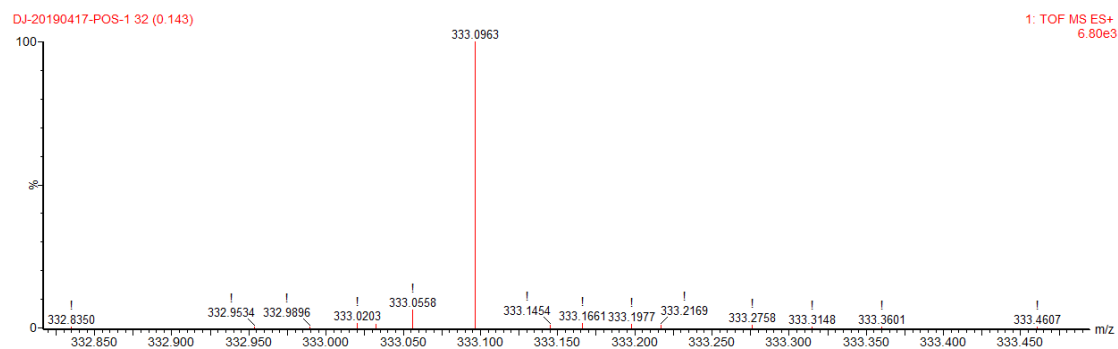

Copy of HR-MS spectra of **3bm**

HR-MS (ESI)  $m/z$   $[M+H]^+$  calcd for  $C_{19}H_{21}O_7^+$ : 361.1282, found: 361.1284.

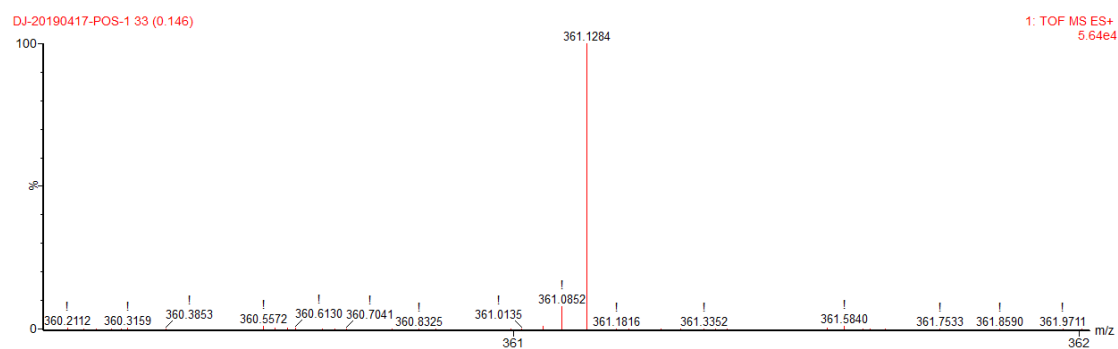

Copy of HR-MS spectra of **3bn**

HR-MS (ESI)  $m/z$   $[M+H]^+$  calcd for  $C_{13}H_{17}O_7^+$ : 285.0969, found: 285.0970.

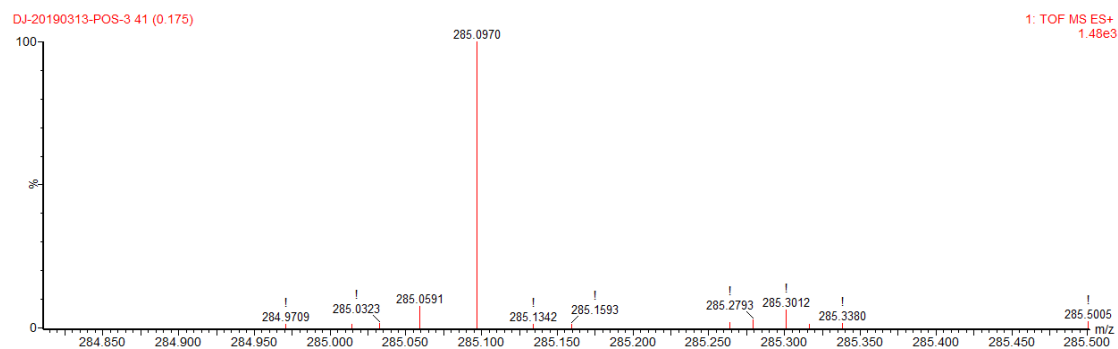

Copy of HR-MS spectra of **3dm**

HR-MS (ESI)  $m/z$   $[M+H]^+$  calcd for  $C_{15}H_{15}O_5^+$ : 275.0914, found: 275.0917.

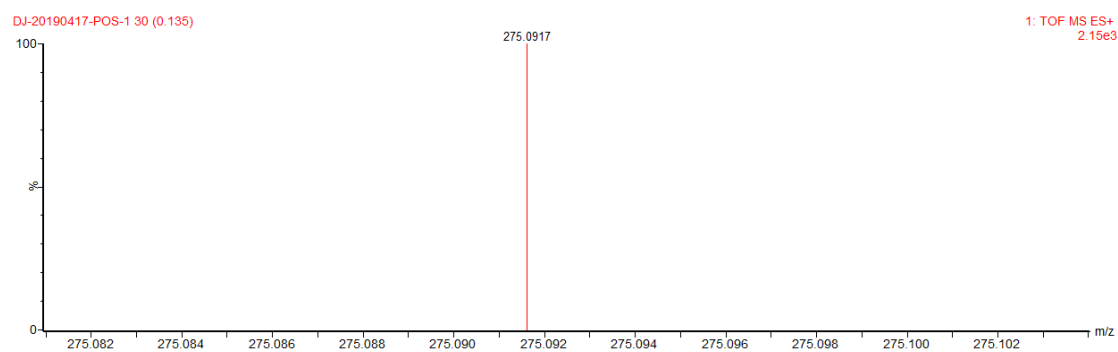

Copy of HR-MS spectra of **3en**

HR-MS (ESI)  $m/z$   $[M+H]^+$  calcd for  $C_{10}H_{13}O_5^+$ : 213.0757, found: 213.0756.

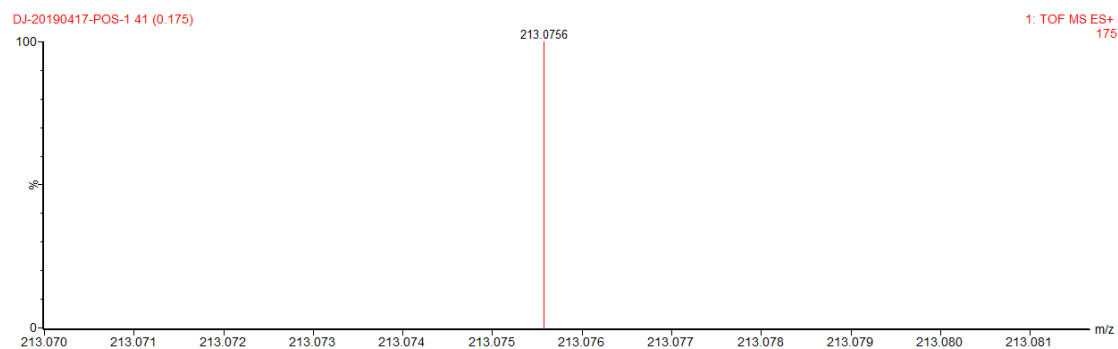

Supplement: c9ra03563j1.pdf [file c9ra03563j1.pdf]
